# Supplementary material for: Emergence of Noise-Induced Oscillations in the Central Circadian Pacemaker
Source: PLoS Biol. 2010 Oct 12;8(10):e1000513. doi: 10.1371/journal.pbio.1000513 (PMC2953532; doi:10.1371/journal.pbio.1000513)
Supplement: Dataset S2 — Bioluminescence data from 16 individual Bmal1 −/− SCN explants. (0.86 MB XLS) [file pbio.1000513.s002.xls]

## Sheet: Photons
			Cell 1	Cell 2	Cell 3	Cell 4	Cell 5	Cell 6	Cell 7	Cell 8	Cell 9	Cell 10	Cell 11	Cell 12	Cell 13	Cell 14	Cell 15	Cell 16	Cell 17	Cell 18	Cell 19	Cell 20	Cell 21	Cell 22	Cell 23	Cell 24	Cell 25	Cell 26	Cell 27	Cell 28	Cell 29	Cell 30	Cell 31	Cell 32	Cell 33	Cell 34	Cell 35	Cell 36	Cell 37	Cell 38	Cell 39	Cell 40	Cell 41	Cell 42	Cell 43	Cell 44	Cell 45	Cell 46	Cell 47
		Average	71.3528	36.0224	83.0227	51.5095	39.6185	67.3653	31.7392	18.6109	13.5607	20.0545	19.3306	19.0166	34.9374	58.905	25.3164	24.3434	13.8539	89.3522	32.6448	68.915	77.0381	13.2824	21.4663	49.7676	17.9332	12.5967	25.5686	33.2376	8.68283	52.1606	21.4884	19.3362	50.0027	14.0094	18.8071	38.3737	21.7666	7.76084	68.2741	9.82175	10.2241	36.6628	25.3538	24.156	23.0813	55.0965	37.926
Plane	hrs	days
1	0.5	0.0208333	304.255	66.8283	52.2272	65.7381	36.7782	73.6658	119.321	19.0352	20.7212	68.9972	14.9968	44.6685	40.8742	90.8615	23.8957	46.4734	13.1326	64.3286	169.689	95.9166	73.4372	11.688	28.183	12.4773	20.529	16.0233	16.0437	62.7322	15.9648	28.9891	22.8839	16.6319	74.037	24.5823	15.1588	24.7087	9.66856	16.638	52.3271	12.5216	9.48875	31.6573	27.9249	18.5779	53.4578	52.8063	12.0017
2	1.00021	0.0416753	260.443	59.4809	61.6474	63.6658	30.7454	72.0212	87.8492	22.3831	20.2055	58.2634	15.9114	35.2384	33.1477	87.485	24.9077	29.9491	11.8966	63.1804	119.601	93.4839	105.989	11.6784	22.9863	13.9766	15.2154	13.2497	15.2164	61.0587	11.313	28.3367	26.2415	21.0208	78.8344	20.904	15.5387	26.6843	15.3713	14.4873	56.4728	13.2806	9.57649	31.4723	22.1832	15.8627	56.7276	48.6801	14.5902
3	1.50042	0.0625174	215.532	61.8362	88.886	78.2438	31.3585	71.6319	58.1003	29.8472	23.1346	51.7335	24.096	30.2754	36.5143	107.065	29.141	19.2541	11.2737	78.5076	95.1359	97.7271	116.08	14.6077	24.4269	15.8936	16.8893	11.43	12.7444	65.3891	10.5833	43.0313	28.0125	29.6236	93.4609	20.7285	23.4027	35.7835	23.7696	13.2514	106.648	15.9373	14.2572	33.0392	19.1178	19.2007	84.5408	48.2616	34.1018
4	2.00062	0.0833594	176.645	66.9843	107.687	84.8706	30.9101	71.5346	45.9553	29.0785	23.806	51.568	31.91	24.816	48.7961	125.652	31.3012	13.2791	10.4661	76.4931	77.1326	88.7249	114.29	17.3228	25.9933	20.5837	19.7407	11.4591	11.2849	52.5921	11.8385	63.3119	28.1001	34.392	97.8696	21.089	32.5693	48.2983	29.9393	15.5384	176.2	15.9082	15.065	37.8758	19.624	26.772	104.402	47.8723	63.355
5	2.50083	0.104201	163.235	69.3294	112.514	76.7934	26.093	73.695	41.1285	24.4073	26.9201	48.2105	29.5163	25.9447	59.0821	153.64	37.1891	11.0699	8.10147	76.5711	59.5671	86.3607	82.9931	16.4855	25.2928	30.831	21.3659	13.0356	11.9564	36.3016	11.4202	76.1964	32.5668	32.5428	96.4386	21.1863	39.2935	54.6627	38.0846	18.886	212.693	17.5917	15.7073	40.6296	21.58	36.7567	99.9556	47.376	84.4044
6	3.00104	0.125043	146.604	63.14	105.916	73.4748	22.4145	63.5937	38.8122	19.6098	25.6259	50.8089	22.5486	29.9249	67.0427	157.328	41.0038	9.49339	7.17666	83.0523	43.9776	85.6986	88.472	15.1136	26.7134	39.4537	23.8572	13.7265	12.5209	26.9008	12.3935	84.9844	37.6176	34.4211	98.7647	17.7215	45.3275	60.8226	33.6764	20.8615	218.23	17.8934	18.7434	45.5345	23.4389	42.8098	85.8736	49.7308	106.505
7	3.50125	0.145885	132.386	58.673	91.1437	72.7843	19.9043	53.3172	34.4618	16.9919	20.7112	42.5661	17.8288	26.2756	63.5783	158.944	43.2905	10.0189	9.08405	92.7741	41.5347	80.8718	83.1002	15.5318	23.9691	44.8549	28.0321	15.1962	13.6011	32.4283	12.7438	89.2562	39.0382	38.9464	98.8327	17.2351	43.6047	60.9685	26.7863	21.3578	213.997	16.9981	21.2153	48.6778	25.4922	45.7681	78.0884	65.3985	130.96
8	4.00146	0.166727	118.081	55.6957	77.6266	70.2832	18.1334	42.0383	28.4479	12.6126	24.2146	34.1193	13.1381	24.6896	60.4253	150.273	44.9254	10.8072	10.1936	96.0629	46.8286	77.8063	92.9489	15.5027	22.2859	48.8545	30.2897	15.8481	17.3087	42.9284	13.9798	91.1052	37.4912	48.4051	108.253	16.8846	37.6584	63.9755	25.1029	22.4088	201.298	18.7887	20.4953	49.5438	26.8448	42.8679	61.9636	76.3756	129.705
9	4.50167	0.187569	103.941	53.5935	79.5534	67.9673	18.503	37.883	28.1464	11.4057	24.0009	27.4043	10.0629	20.7189	65.7089	149.533	45.0328	14.5733	10.7778	101.708	56.346	70.0603	102.963	13.9945	19.1229	56.7954	34.2309	16.2472	20.9095	47.3566	17.3759	87.6407	32.4891	52.794	117.079	15.9214	35.0115	74.5443	28.3919	23.5085	179.217	17.2706	20.7871	48.0451	27.8762	42.7316	54.0127	73.1744	121.521
10	5.00187	0.208411	93.5571	49.0389	78.483	72.3074	21.7339	35.2068	28.9636	7.28954	21.7526	24.8646	8.92417	15.7268	77.5233	156.025	50.6672	12.1209	10.8165	91.6163	75.9553	67.374	110.504	12.2916	16.0769	59.4423	32.1387	17.6191	23.1767	49.0981	17.4831	90.1904	24.0127	50.877	125.468	14.189	33.2205	94.8441	39.5543	23.382	175.733	21.3967	18.3638	47.4614	30.8541	40.6687	51.1515	65.1556	128.965
11	5.50208	0.229253	81.4413	37.6337	85.6064	70.1957	24.2345	33.0366	32.5354	6.14129	21.3147	21.2444	7.99003	13.7999	86.5638	147.178	47.66	11.216	11.5658	90.5451	75.1184	72.9408	105.347	11.2402	14.1795	61.573	27.4481	17.8528	19.1479	41.3907	17.2884	93.5964	18.9328	50.3225	128.612	14.4518	36.6272	97.1506	48.2251	24.1508	188.705	26.2625	17.5756	50.4584	38.3281	36.6108	57.0296	63.5207	108.101
12	6.00229	0.250095	89.8883	36.4954	98.6564	71.4703	30.064	31.8007	27.6401	6.86133	23.8645	18.0329	8.39868	13.8877	93.8528	156.929	40.5172	13.0066	14.3975	94.1947	72.9188	87.3435	119.535	11.2307	13.5663	70.0499	24.6745	16.3151	20.1501	40.0871	18.2809	92.9347	18.3492	46.5563	130.538	16.846	38.1454	91.8858	47.4172	25.1726	194.924	24.141	17.1087	51.6457	43.6122	35.793	64.3378	62.7515	92.8803
13	6.5025	0.270937	98.783	40.2609	102.257	72.0252	36.2527	32.9491	22.901	6.43312	27.7665	18.7534	9.15782	15.2595	90.5634	166.525	40.7602	14.2425	14.9332	90.2534	69.4645	87.275	138.171	11.0752	19.0939	63.315	24.947	15.0599	20.7342	40.8656	18.3684	85.1977	18.3394	47.2764	128.241	19.8044	39.0402	97.9775	44.0014	22.7786	183.148	23.5182	15.7168	48.911	44.0014	35.9389	68.8146	60.903	76.9013
14	7.00271	0.29178	90.3846	45.0488	93.2262	71.1298	37.1286	38.9632	22.5018	8.00958	27.7472	24.2805	7.85365	20.2225	82.3112	172.169	39.8163	14.3396	17.512	79.7627	69.3863	88.8613	140.215	10.0433	24.8356	63.1109	26.1441	14.8069	21.8243	48.3102	17.9792	78.785	20.4803	44.6194	125.818	19.5511	40.315	87.3896	42.9991	20.7447	176.628	22.5061	15.9505	48.4442	42.7753	37.5158	71.111	61.3894	57.0882
15	7.50292	0.312622	78.8236	45.234	75.583	69.7574	40.4375	55.3705	26.4044	8.93418	25.9273	21.3222	7.71775	26.0906	83.3233	163.274	37.9771	17.9988	17.3948	79.1303	66.2916	97.4251	133.656	11.7366	27.307	64.9498	27.7108	12.5199	23.3325	42.7727	14.8945	74.6495	23.0591	42.3034	128.854	18.3543	43.595	80.3537	38.5324	22.2045	164.24	21.0075	15.5223	53.0763	41.2086	31.6473	68.7368	60.9902	40.9728
16	8.00312	0.333464	72.4591	50.9465	69.7538	69.2805	47.0939	68.8195	32.6033	9.05101	28.2629	25.5265	8.03866	28.6308	98.0376	144.171	31.9143	26.3193	16.6847	86.4681	64.8906	116.265	128.332	12.3694	24.096	58.7802	28.7618	12.2474	28.1301	36.3016	12.2183	74.1139	25.4435	44.0162	119.61	17.2446	42.3592	73.2497	26.8641	26.8756	145.838	20.3749	13.644	60.3944	38.6784	24.3682	63.8613	70.206	30.6863
17	8.50333	0.354306	58.9809	56.9609	60.4212	65.9328	50.1497	71.6709	36.0189	9.23555	26.1316	33.9733	11.5616	27.4434	110.368	142.07	27.0096	31.4184	17.0449	95.7809	67.7126	127.35	121.608	11.0457	22.9282	55.3741	26.903	12.3448	31.0108	33.6347	9.10417	74.1038	26.7474	38.6736	122.247	17.2446	39.2448	63.4014	16.8308	24.7541	136.807	17.2122	12.9239	67.5957	39.8948	16.5637	65.1356	72.0645	22.2103
18	9.00354	0.375148	51.6628	59.6559	52.2078	67.9381	53.4875	68.6736	42.5099	11.8534	24.1953	36.3867	17.5074	23.7359	110.26	154.818	21.0248	31.876	16.6945	109.133	71.1964	137.091	114.037	11.6102	19.9794	55.4325	21.7842	10.7875	24.6269	29.5864	7.18713	68.9079	26.436	38.8682	129.477	17.6924	43.7996	72.0919	13.6295	21.8444	144.125	15.2756	13.2158	74.953	41.6658	14.0236	90.0876	66.3134	17.6557
19	9.50375	0.39599	44.841	60.6972	49.6484	66.4097	54.3152	67.6226	46.0132	14.9577	22.784	40.396	17.6147	20.5926	94.3297	157.737	15.6046	29.3946	16.3926	109.366	62.2241	136.702	96.7437	13.3035	17.9652	55.1897	20.8793	11.9846	17.6299	26.4629	6.37926	64.9374	22.3293	41.5738	119.804	20.1448	49.988	84.1299	11.5758	24.9098	164.843	14.8863	18.3443	92.7131	38.9118	11.357	95.6737	59.988	14.5902
20	10.004	0.416832	36.793	62.2548	47.342	55.3355	52.6213	54.4558	42.5585	18.7534	22.7061	42.8098	16.9819	20.758	79.7131	165.688	12.2857	27.5553	15.0498	111.848	63.8587	125.15	87.9464	16.4469	14.4618	58.2552	19.8283	11.6732	14.2432	24.0981	5.26029	64.2368	20.2466	41.7197	106.034	25.1274	51.5647	73.7461	9.26953	22.4769	190.388	13.8256	20.0671	88.2756	35.1457	9.23555	82.0296	55.6283	11.9625
21	10.5042	0.437674	38.2819	64.8332	49.3759	51.89	55.833	49.337	43.9698	19.3761	21.4704	42.8584	16.9042	20.6508	65.232	154.749	9.96962	24.6454	13.5217	113.191	72.1987	125.637	90.7298	20.8844	12.6417	58.0313	16.6073	12.1307	12.5209	27.6307	5.1629	71.9052	20.7819	38.294	106.316	25.2442	48.2666	63.275	7.34268	25.63	172.706	14.7404	18.5584	75.8189	31.1655	7.9123	65.0871	54.9569	8.15768
22	11.0044	0.458516	44.3642	60.8044	65.3356	43.8814	55.6482	42.5054	36.2917	15.6587	21.2761	41.9338	16.9724	21.4294	46.9075	145.125	8.54889	19.3417	14.3882	137.627	79.7601	124.995	110.699	25.536	11.8339	54.0317	15.5465	10.4957	11.6254	32.1262	5.2214	75.7394	22.3391	37.029	118.004	23.9305	41.9111	56.7546	6.67109	22.8857	201.735	16.6769	12.9144	68.9195	22.1153	6.99771	47.6481	61.2044	6.15283
23	11.5046	0.479358	51.5266	55.9488	86.2779	34.87	56.0957	42.5346	43.4055	13.3913	21.1397	26.587	15.6973	22.6263	35.9697	152.025	8.79249	15.3226	12.5778	151.766	75.2739	130.687	122.883	25.0301	9.73194	48.2995	14.4955	9.80484	13.5427	41.0114	4.76386	67.5354	24.9957	37.0094	137.195	21.3417	37.3188	52.8331	7.05085	19.7716	202.65	15.5481	11.9216	64.6278	20.3636	6.55949	33.7225	62.6157	7.19418
24	12.0048	0.5002	52.7819	53.2726	95.6883	31.5129	46.3547	46.3105	38.7636	12.934	20.4584	23.4632	14.7536	22.529	23.9803	159.771	9.75599	12.1889	13.8623	159.085	70.0872	140.01	118.105	21.5558	9.38194	47.6666	15.6922	8.81234	18.6031	48.2616	3.53769	71.2723	23.3513	36.7953	137.652	20.5635	30.6127	52.7162	6.61293	18.2048	154.644	13.2514	11.7171	64.7637	17.8818	7.31863	28.3021	60.5423	7.34054
25	12.505	0.521042	58.3873	51.3359	101.985	34.3545	37.5866	38.4474	33.479	11.8048	21.9375	22.3831	15.7655	22.6459	18.725	168.335	9.73637	10.4957	14.2029	161.819	68.1312	147.611	124.917	17.7897	10.1311	42.3924	16.8701	8.85123	23.1767	51.22	4.66647	66.2804	26.3873	26.9275	131.268	19.2789	23.45	54.8377	6.37926	13.5531	124.545	11.7041	12.5444	57.2415	14.3883	7.81502	24.1467	53.6527	5.73429
26	13.0052	0.541884	57.8423	51.5401	96.0873	40.0181	31.9226	34.438	31.4063	13.1185	20.6041	21.8963	18.8406	24.5533	17.3243	159.421	7.90692	7.90707	13.6193	146.813	58.4479	145.051	116.431	14.5977	11.8148	38.8988	15.0599	10.3889	22.8849	46.1596	4.06319	66.5622	27.7984	30.2463	118.51	20.028	18.0687	62.7395	8.69533	11.13	105.889	10.8672	10.4229	54.39	11.6634	6.76406	22.2589	53.137	5.68571
27	13.5054	0.562726	52.0229	50.1969	95.7759	42.5776	34.9004	23.2954	24.0396	11.8148	21.2468	22.2468	29.2826	28.6112	18.0148	167.994	7.91673	5.51323	14.7092	132.945	48.3178	143.066	98.8364	11.873	13.7317	39.278	11.7026	11.5274	23.0991	42.3542	3.62527	70.0951	28.9661	27.638	106.91	17.1865	17.0959	72.4906	11.3912	9.135	83.7989	11.6652	10.637	51.0621	12.9382	5.95628	17.3928	50.6651	6.86346
28	14.0056	0.583568	48.4611	54.4787	96.7588	46.5189	44.1353	18.6145	28.0493	8.43778	18.0063	25.6333	36.1144	29.3899	25.5568	172.909	11.3031	5.88283	14.2808	120.353	35.3457	132.984	84.0052	10.1601	14.88	39.084	10.7781	10.4372	24.4127	40.0578	3.89783	76.1474	35.1944	24.0764	106.355	14.4131	16.4447	83.2634	15.6046	5.65111	70.5541	12.6578	11.8048	47.4905	17.8724	6.29675	12.7024	51.0736	7.53486
29	14.5058	0.60441	45.6682	59.1696	91.8736	51.1995	53.6241	16.2692	27.9129	6.59859	18.162	30.3727	34.9757	28.3971	39.4632	182.027	15.04	5.60081	13.8819	112.286	24.446	125.413	74.8672	7.47456	14.5591	38.6552	10.4081	10.233	22.8068	30.8613	3.88802	74.8823	38.2111	24.1932	112.185	11.3866	16.6284	93.1117	21.4728	5.1256	66.2916	10.7602	12.0094	42.5566	21.9012	6.00492	10.0454	56.3483	7.9727
30	15.006	0.625252	44.6074	57.5931	85.5481	50.3529	58.4605	14.0699	27.5915	5.92719	19.9134	34.3725	26.772	29.3704	41.8768	176.256	16.0324	5.28937	13.707	107.283	17.0696	110.388	61.0194	6.28721	12.9921	37.6534	11.1379	7.42046	24.7046	26.628	4.5985	71.0294	37.0627	21.0303	113.625	10.7538	14.2932	96.5083	27.5455	3.64641	58.3316	8.56084	10.9875	37.0681	20.6362	6.50131	8.38127	57.166	6.61994
31	15.5062	0.646094	44.7729	55.8313	81.4413	42.8015	64.5134	13.5054	24.8081	6.67632	18.8913	37.3694	20.7967	30.2559	37.1371	158.642	16.5386	4.76386	13.6678	97.7471	15.5614	97.1429	49.8573	7.23089	13.3035	36.4757	14.252	7.29399	22.291	22.0546	4.98773	73.1501	34.2698	19.2593	102.054	12.6903	10.3522	84.1394	31.623	2.20614	38.3718	8.68735	10.8902	34.3238	21.7649	5.90764	6.77565	54.7526	4.67363
32	16.0065	0.666936	43.1088	58.4397	74.133	33.8871	67.8512	12.7366	19.1156	6.45268	19.2613	40.5715	17.4883	30.6354	29.2939	130.917	15.9937	4.36483	13.58	88.4046	14.3936	99.0114	46.4903	7.70773	13.5758	34.2276	16.0331	7.67375	20.8605	19.0863	5.70767	73.6857	36.1869	21.7117	83.4571	14.705	10.0989	77.1617	35.311	2.64406	33.2824	10.1763	9.22601	32.9028	22.6699	5.22623	6.4742	49.1473	3.64224
33	16.5067	0.687778	45.2595	59.6662	70.7366	29.8969	67.9686	13.0675	17.2278	5.20668	17.7142	41.2328	14.9386	31.4918	22.5599	113.109	19.7207	5.24067	13.259	79.0523	12.5544	105.21	48.1252	7.56182	11.2402	36.4371	14.1255	5.99004	19.6249	20.6041	5.07531	68.8884	38.4059	21.4294	71.8183	16.7487	10.0502	76.5585	29.9201	1.89473	34.9852	14.6528	9.08963	33.4574	17.4148	5.1876	5.73429	47.5124	4.02154
34	17.0069	0.70862	44.8994	55.598	68.9363	31.8337	62.1776	13.6028	15.3494	5.70307	16.0108	35.9098	11.9021	30.5577	17.742	103.26	20.4019	4.96811	14.2612	75.1014	10.3452	106.437	57.4675	5.40171	9.94605	36.6799	11.3814	5.14328	21.4544	22.8911	4.94884	64.9374	33.3747	19.7653	63.5269	17.0892	11.7341	77.269	21.794	2.09909	33.837	17.5041	8.6228	32.5233	13.6876	4.52574	6.57136	54.4991	2.69805
35	17.5071	0.729462	44.841	55.7927	60.9175	28.9242	56.0274	14.2256	16.6828	5.34306	17.1786	37.5449	10.5106	29.8667	14.8815	94.424	18.3196	6.01912	16.6847	69.2429	10.5593	101.357	61.8372	4.30162	8.92417	39.5799	10.7781	4.76386	24.987	26.3851	5.99004	65.1414	25.8814	16.476	56.1698	16.5833	14.6244	72.7728	15.6046	2.73164	31.4332	16.2293	10.0729	29.5067	9.52247	4.38936	8.46909	50.9665	3.75933
36	18.0073	0.750304	49.7554	55.5783	67.8853	27.9121	48.0871	14.6927	22.5996	6.34538	18.512	40.2792	10.8997	32.2119	12.8572	83.6313	15.6236	6.42796	19.9153	65.8561	12.3985	115	69.7875	5.20668	9.47921	38.2367	10.1163	4.54981	22.6805	26.5894	5.27956	62.6696	20.2858	11.5811	51.9561	18.6656	14.5075	45.4272	9.48358	2.28399	31.6182	13.6018	8.37913	31.2	8.52997	3.38703	12.3324	47.9303	3.52578
37	18.5075	0.771146	56.0128	53.6029	60.1779	28.817	40.7782	15.3836	26.5308	6.89042	18.4927	41.9143	9.71239	26.4702	13.0031	79.4662	15.2542	5.96096	17.9986	73.7973	13.1967	134.473	77.4562	5.72262	11.1043	39.7257	8.91919	4.88052	17.5032	27.4551	4.35502	55.9937	13.8141	11.3475	54.7003	28.5235	12.9211	50.4097	6.1554	2.72191	35.8226	10.7699	7.32816	36.7176	7.16752	3.30931	16.8286	45.3418	4.90719
38	19.0077	0.791988	64.8977	55.9196	55.6333	36.456	34.628	17.3591	28.6522	8.30141	20.9934	37.7881	8.93418	24.2905	15.1928	88.2931	16.8013	4.91941	17.658	86.7116	15.4155	147.241	87.6449	6.77359	13.5758	42.8204	7.80022	5.27956	14.8465	27.8936	5.27956	51.6239	9.29861	12.1939	55.4495	28.5335	13.5933	48.0937	6.35018	2.56621	36.6594	11.4706	9.08009	33.5742	6.73941	3.39705	15.6315	39.1722	7.65195
39	19.5079	0.81283	65.433	53.1071	66.3866	37.342	25.2855	20.8528	28.8278	9.23555	22.8132	35.4134	8.89508	25.8865	20.7784	88.1662	22.942	4.78348	18.0569	92.5595	11.0848	147.358	81.9517	5.78128	14.6759	39.6484	6.45703	5.35733	16.1311	29.09	5.49361	41.6199	9.19175	12.4471	52.7445	30.47	16.9498	35.0148	5.41584	1.62225	53.699	13.0665	10.0729	35.9003	7.28418	5.6058	12.021	34.9781	11.9239
40	20.0081	0.833672	66.6689	50.5476	83.7964	39.181	21.9187	21.9816	26.3459	8.59324	23.7182	40.941	11.357	32.0464	46.9177	89.3823	20.8886	8.07243	15.9452	104.646	9.9265	138.94	80.2589	6.57904	13.8094	38.4802	7.2551	6.6322	20.8997	33.4304	5.0655	32.6287	11.6634	13.4108	47.7619	32.9224	19.2474	24.6701	4.50111	0.99943	75.6926	12.2296	10.3547	39.0045	7.45934	6.50131	11.9531	32.934	13.4709
41	20.5083	0.854514	74.4541	53.3113	99.5128	41.6727	24.5944	21.6507	23.2318	7.19226	23.4753	35.6862	16.1255	33.8174	87.732	86.0448	18.6891	11.6928	16.198	130.581	8.6228	138.92	81.6989	7.10452	13.7708	44.9613	6.84626	9.45451	24.6559	35.1918	4.68609	29.8844	18.8649	16.3591	40.2296	36.4157	24.7261	17.2547	3.80044	1.16487	96.9074	11.6847	11.1625	38.3331	7.70283	7.94139	14.4637	32.2334	15.6508
42	21.0085	0.875356	79.4269	60.8533	109.215	42.5776	25.5386	27.6259	32.1947	6.93906	22.6868	34.3138	21.6531	35.5302	112.382	86.0354	18.6602	17.9305	18.076	142.765	9.26511	153.625	86.0001	7.09499	14.4618	46.9469	5.90245	12.8118	27.9453	33.479	5.45472	32.0152	33.2286	19.6971	37.7772	35.0925	28.7841	15.6196	3.16773	2.63433	117.49	11.4608	12.7976	38.109	11.2549	10.9193	21.8011	39.4836	20.8769
43	21.5087	0.896198	84.2148	65.5048	124.688	43.395	27.8744	40.5591	40.8557	9.71239	19.7676	34.0415	35.1607	38.7127	123.885	86.9112	17.1517	23.5166	16.3049	152.477	15.3668	162.607	95.5373	9.13827	15.2986	41.6427	6.94365	14.1157	23.1281	33.8782	4.98773	33.8743	57.7325	26.9179	36.96	31.56	30.1075	15.055	3.51807	3.68534	116.759	9.70916	13.2744	40.036	12.7438	14.1599	29.6157	46.0618	34.5397
44	22.009	0.91704	93.5085	68.0934	131.51	45.867	37.9466	58.6111	50.5772	21.0985	18.7263	30.9373	38.6932	42.0797	118.62	88.2542	20.1589	28.8592	17.755	152.35	24.4269	174.772	83.5866	10.1215	16.9137	36.5829	9.10417	14.2909	17.3671	29.5864	5.42565	47.1287	66.2187	35.618	35.8987	30.47	32.014	17.1765	3.51807	5.35916	96.7515	9.21285	14.7341	41.3888	16.1498	16.9724	35.7467	56.2119	31.5134
45	22.5092	0.937882	95.6981	70.2729	114.694	56.2404	50.5	76.595	55.9491	29.4385	17.675	33.0683	42.9457	41.8461	105.647	92.828	24.8107	29.2096	20.2951	119.069	33.331	175.277	74.1864	11.7757	19.7748	43.2681	12.0529	13.9602	18.778	23.5531	5.6397	53.5702	51.1542	36.9803	33.3685	30.149	35.9272	18.442	3.4403	6.5756	84.7622	9.3199	14.2572	41.7879	17.59	18.5293	36.0874	62.0994	22.1611
46	23.0094	0.958724	96.895	65.5245	101.566	59.8506	56.5626	90.1608	60.6302	27.3948	16.9357	34.5279	45.4954	43.8312	107.769	92.1857	24.9758	31.0488	16.5092	130.951	36.4258	182.255	81.1639	11.5811	19.5416	64.4052	21.1617	11.9457	23.2156	22.7553	5.86357	53.395	38.7268	42.2743	34.4488	29.7108	38.4279	32.8447	2.85664	6.9454	72.8315	9.57292	14.8509	46.6827	22.9326	23.2977	36.3595	62.3622	18.1907
47	23.5096	0.979566	102.705	59.004	88.4189	65.1643	58.8397	80.9353	65.2135	25.6238	14.4444	38.8682	46.955	41.3206	98.5823	97.5864	22.3093	32.3332	13.2105	140.614	38.0509	180.902	81.3974	12.3303	20.8844	67.023	31.4868	9.98982	30.8939	22.3075	7.80022	50.4374	28.139	43.2766	35.9576	30.3922	37.4051	41.3401	2.72036	7.37359	66.4084	10.1373	15.1332	51.6262	22.8741	31.3068	32.5255	59.4238	18.9306
48	24.0098	1.00041	116.767	57.6025	84.7014	60.8533	61.7887	63.5937	56.3097	21.1762	14.5609	41.1842	46.8873	38.2845	89.0555	107.98	21.1414	31.2822	11.2933	134.609	40.4933	184.435	90.7005	10.8025	24.456	74.6139	43.2328	8.53978	30.3781	21.7333	8.83161	46.5931	20.0035	37.9927	35.033	25.7697	37.5025	45.9431	4.98773	7.98668	50.7893	11.7431	17.4783	54.4195	16.6266	35.8807	30.9391	64.5714	22.9397
49	24.51	1.02125	126.148	54.3525	83.8256	55.5688	62.781	54.9034	54.8984	20.5048	14.7365	43.4616	43.7048	34.1874	81.4551	111.26	18.6798	36.2356	10.1451	129.773	45.7972	176.776	102.826	10.0238	27.132	77.2119	51.7186	8.8218	24.6755	21.4511	8.8218	39.2166	15.9066	32.7474	42.9934	23.8232	32.0043	46.7313	10.5248	7.28601	45.6804	12.9498	18.0524	51.6071	11.4493	34.6056	34.2382	59.5502	26.0538
50	25.0102	1.04209	129.301	45.5942	99.1528	53.9726	59.9004	38.7977	54.577	18.3929	13.8409	48.3078	43.8994	32.4164	69.1836	119.852	17.609	41.2086	11.0209	121.949	57.4361	182.216	103.225	10.7443	28.0566	86.0577	53.12	11.7902	23.7216	20.5655	9.25972	33.6307	17.3661	29.6722	56.1796	23.2977	29.8834	45.3008	14.5733	7.79205	43.082	13.6504	18.5779	45.4176	11.5369	29.0003	33.8004	57.0197	32.5155
51	25.5104	1.06293	128.746	44.7957	100.505	56.0457	58.6164	33.0853	49.1958	16.1741	14.0066	48.746	44.999	30.9859	71.4025	124.484	14.8743	39.7295	10.32	105.872	61.2604	184.25	118.659	13.1476	26.0615	85.6392	47.028	9.42543	18.9534	23.436	9.14306	31.1199	26.1928	30.3045	75.6617	20.4171	29.3672	44.4444	16.354	8.49272	39.4132	13.3877	16.4178	41.6711	12.6755	22.6945	29.5085	50.4508	40.0186
52	26.0106	1.08378	128.824	41.478	107.444	56.1041	62.8012	32.7934	52.3	15.9991	13.588	47.8214	45.5831	26.3925	70.6726	129.311	13.8334	39.486	10.3593	97.4064	65.2215	177.847	124.713	14.8995	25.0687	82.8756	40.6344	9.26953	16.929	28.8564	8.44239	31.2756	32.1678	31.8614	84.4497	21.108	25.582	39.715	19.4391	9.94272	42.8193	13.2222	15.0163	42.9752	10.846	20.6608	29.0321	51.2586	44.7676
53	26.5108	1.10462	129.554	36.6996	112.485	54.5378	63.2093	33.7081	50.1008	14.199	15.6901	44.318	45.2913	23.5023	66.848	131.812	13.8334	36.4983	11.41	95.314	63.4696	168.991	124.051	17.021	21.1863	86.2619	37.5882	9.81465	15.9268	39.0943	8.49108	33.3878	43.0089	28.9131	94.3952	24.5242	26.7788	30.3822	21.7163	8.9501	42.6929	14.0494	15.1913	48.1228	10.0091	17.4297	29.6157	45.0497	43.7754
54	27.011	1.12546	127.754	32.9041	113.04	56.7954	62.9763	35.7907	54.0906	13.4299	15.1351	40.3473	45.1353	22.3636	67.529	128.202	12.1304	37.7441	11.78	93.3189	61.9613	169.701	110.67	16.836	20.0866	99.127	38.4252	11.0503	16.6371	53.6627	9.12344	39.7911	43.9237	27.288	104.759	21.3322	31.7524	25.2928	18.8064	6.00144	48.4833	15.6259	15.7755	51.0425	10.6029	14.2477	30.6863	44.5633	34.5789
55	27.5112	1.1463	117.555	39.6484	114.49	51.6276	64.5231	37.9413	44.0476	15.3373	17.0814	36.6399	38.5668	19.8916	65.8556	116.466	11.7217	41.0723	11.7506	89.6211	62.1559	145.285	120.849	15.2109	20.2907	101.463	38.1529	13.7948	16.5202	56.2804	9.82411	47.9166	41.1403	26.042	109.071	18.3347	36.4226	23.4923	19.2737	5.29104	50.877	15.6746	16.0282	60.4335	11.9359	11.2698	31.0949	42.8798	28.8278
56	28.0115	1.16714	108.184	38.831	104.651	52.7082	62.859	62.6205	32.2626	14.8218	14.7751	37.389	31.891	18.6947	57.6419	101.82	16.597	35.9147	11.6634	91.1197	60.9299	130.405	96.6173	13.0503	21.5072	92.3346	37.0238	15.3517	17.2016	52.4656	11.2062	59.0199	34.844	27.1807	113.43	15.7268	38.6325	25.711	24.8595	4.61956	55.7819	14.7793	16.9724	64.8515	17.6191	11.357	33.7225	51.1515	22.5703
57	28.5117	1.18799	105.751	40.5628	89.7715	55.248	61.6818	70.6783	32.6519	12.5835	14.8144	36.8249	26.2465	17.897	53.9923	88.371	21.0444	35.4571	9.96962	93.5913	56.8133	116.898	118.767	11.9607	23.5409	92.3346	31.3214	15.955	19.8779	44.7969	11.8872	66.0663	37.316	36.698	120.66	17.0015	34.7583	33.7397	32.7809	5.54406	71.43	15.5967	18.617	63.966	24.1199	10.8315	35.9609	59.9295	15.2715
58	29.0119	1.20883	112.368	41.8768	74.9115	55.3158	59.628	71.8947	28.8857	11.8439	15.8264	37.2917	19.843	18.9379	59.7537	81.6562	25.0341	40.7023	9.97943	92.521	55.3146	110.106	108.665	12.1453	24.7573	109.102	28.8785	16.9478	20.043	42.7142	13.201	69.5984	34.9705	40.9997	113.226	15.97	32.1699	42.8389	31.5936	8.48299	87.9055	16.7645	18.7725	54.575	36.333	9.78058	37.1966	67.744	12.0895
59	29.5121	1.22967	125.048	41.3802	66.9316	55.598	59.1323	70.9702	30.4334	12.0775	15.3301	40.6492	16.8164	18.257	60.5908	84.4192	28.3235	43.9139	9.85299	93.4257	49.1838	106.135	121.959	13.7317	25.361	105.628	23.7016	17.7361	17.8535	42.2277	13.3958	67.389	31.8662	37.1363	103.465	15.5418	29.8153	60.1903	30.1923	8.82359	104.576	15.4508	17.6342	49.0183	42.3762	10.7734	34.4232	70.6146	9.91901
60	30.0123	1.25051	137.359	37.5462	60.1293	54.4692	59.5211	70.3182	38.2965	14.1504	16.3515	39.9001	16.1741	17.4688	56.5612	89.928	27.2238	44.8188	9.46389	87.597	46.6145	102.826	138.181	12.2525	22.6459	92.1108	21.2976	15.1667	15.7028	43.6876	13.1915	59.3414	23.4679	32.4455	98.8229	16.0578	27.6833	60.083	30.3093	9.05715	98.7075	14.9545	19.843	45.4858	36.7999	10.277	33.5961	65.8077	8.60549
61	30.5125	1.27135	144.657	34.0132	52.8793	60.1525	58.8888	61.8712	38.9287	14.695	16.0208	39.0336	14.374	18.2665	60.9408	90.8817	22.3583	47.8748	7.91673	84.522	39.2868	90.8761	166.85	12.4762	22.2177	77.1828	19.3515	15.5465	12.0439	44.1255	14.2909	52.938	20.4414	28.6599	100.74	16.6901	27.0905	59.4407	29.5014	9.48534	94.2309	14.5749	18.1692	40.9315	34.844	10.3452	34.0632	74.7021	10.3668
62	31.0127	1.2922	152.939	34.6556	46.9333	62.4006	53.6434	54.6991	41.5663	14.9191	15.4372	40.7951	11.9803	17.6533	61.2616	89.6065	17.5506	56.9929	7.73144	84.5798	33.9638	95.6737	174.606	12.2721	22.0131	73.1051	16.6462	17.7652	11.1001	41.4592	12.6268	49.6589	21.4339	27.453	99.3391	18.3056	29.221	55.6064	27.701	8.92091	86.3873	15.4994	16.301	42.8389	31.0975	11.9507	34.0439	68.3475	9.85112
63	31.5129	1.31304	167.458	36.1935	51.8477	61.3791	53.1179	54.9715	41.3714	16.9724	15.6415	41.4469	11.1138	18.1692	65.2226	78.4152	13.5708	59.6012	7.2159	85.4556	29.8276	98.3985	160.495	10.7734	22.2663	79.8203	17.2495	17.1034	11.1876	44.5733	13.5223	45.922	30.5037	22.9768	104.234	19.3957	28.1217	42.8875	28.937	11.1884	82.7284	16.278	16.1741	42.7998	26.7085	12.3789	34.4232	71.9773	9.37405
64	32.0131	1.33388	183.282	39.6674	53.2199	62.9556	54.8109	63.944	41.4978	17.8092	14.8823	38.3718	9.9656	18.072	67.8207	75.9528	11.78	65.6834	5.89218	83.1005	25.536	99.8385	159.318	10.1892	21.0208	77.9419	18.4171	17.0256	12.3067	53.847	14.0089	53.6099	48.2444	20.9621	109.606	17.8774	28.7354	37.9927	32.0123	12.9206	81.2588	15.9763	16.9333	45.1644	20.4705	13.4785	33.1383	70.3717	8.70265
65	32.5133	1.35472	188.663	37.9159	51.2152	63.393	56.475	74.094	50.2758	19.9794	15.6608	35.5403	11.0943	18.5293	64.6968	76.177	9.65844	68.3694	5.20116	81.5143	23.3855	112.636	143.377	10.8315	24.5337	79.129	20.1982	16.4903	16.4716	55.1905	15.1667	54.7193	58.9394	20.5048	117.449	17.1669	29.1918	29.6526	35.9633	12.7259	80.1983	13.3974	17.3615	47.6364	18.9328	10.9288	28.8371	68.9218	11.1939
66	33.0135	1.37556	193.169	36.7674	50.4366	58.5271	64.3575	74.7071	52.1542	21.994	17.5	33.3892	13.7999	18.1301	62.2548	70.4937	8.82137	69.4884	4.9483	88.6962	23.2882	115.652	142.784	12.2816	29.0003	80.5597	23.2052	13.8824	22.5444	51.395	14.0768	60.1978	58.6083	21.0108	118.218	16.0964	27.5483	19.9989	35.6421	12.5508	84.5581	11.6165	17.7215	52.5899	19.0789	8.74916	20.6041	64.9706	20.5754
67	33.5137	1.39641	182.562	39.6965	45.3179	54.2848	67.2093	76.5074	56.5918	25.6624	17.315	36.9412	14.374	18.8993	59.1893	65.54	6.593	70.1014	4.19897	97.8443	22.1981	110.174	126.795	13.3131	31.7255	83.4983	29.4429	12.2961	22.9139	54.4119	12.8118	66.2508	49.3052	23.4537	119.114	16.1646	28.4236	14.8022	30.0658	11.3441	94.2605	9.08634	18.792	54.2441	15.6533	8.30141	15.9622	64.9899	26.268
68	34.014	1.41725	178.465	36.6018	44.1501	49.1847	63.55	76.4685	63.3743	27.4239	14.3666	35.7734	18.6561	23.5509	54.012	63.1562	5.581	64.6909	4.51069	101.104	20.5635	99.1671	117.939	13.7899	35.4134	76.2968	31.2433	12.9677	25.3275	58.781	10.5248	71.1064	33.2286	22.2758	114.481	16.6996	28.1314	11.698	30.8348	9.16419	107.524	9.02795	17.6342	54.5654	14.5442	9.23555	11.1939	59.151	31.5427
69	34.5142	1.43809	172.071	37.9159	48.1205	43.0348	62.6645	74.4444	59.0632	25.2733	14.5515	31.9396	24.5919	24.271	49.3022	69.0831	5.56138	62.9973	5.92161	100.9	17.6342	88.0927	131.641	12.6417	39.0823	67.7237	32.9561	11.868	24.763	64.5128	9.35711	72.7032	23.7209	25.1274	110.822	16.116	32.8225	10.4424	33.5888	8.0548	107.485	10.6629	17.4006	56.4728	11.0797	9.04099	8.17699	49.9937	32.4669
70	35.0144	1.45893	155.06	36.0571	51.2249	37.4484	63.9003	71.6514	58.6452	22.8891	16.5072	26.3343	28.4558	28.5721	44.9227	70.6105	6.9723	62.5013	7.14778	94.983	17.5756	88.0149	135.368	10.6275	40.941	60.1139	30.6207	10.7098	23.3325	68.5325	7.35249	71.7495	17.4148	30.5772	108.438	17.712	36.559	8.81735	34.1822	7.92829	103.622	13.9521	14.5104	55.811	10.1941	7.77592	5.9392	46.1982	31.2699
71	35.5146	1.47977	142.847	35.5511	54.4947	37.1662	68.8444	70.7269	54.2077	22.7823	17.6264	27.648	33.9929	29.1562	43.142	68.0126	6.593	59.494	7.14778	95.0513	19.9598	95.9166	140.74	10.3161	39.1505	44.8352	30.2217	9.98982	23.6341	69.8167	6.51554	68.3816	11.8582	36.6203	108.993	17.4392	35.9467	8.87553	32.4695	7.79205	101.569	13.6894	14.1013	56.706	9.9702	7.51318	5.36496	43.1134	30.9491
72	36.0148	1.50062	130.274	37.3609	54.7672	34.6367	70.1871	66.2991	52.6992	24.5823	17.7435	29.3704	45.0381	28.9226	41.6624	68.5085	8.39357	61.1094	8.2279	89.5624	20.0766	103.079	132.079	9.40101	36.2994	38.8019	29.0442	10.7294	24.3056	63.005	7.52766	65.8133	7.70283	40.1433	104.039	18.9866	40.3442	9.63467	26.0566	7.04272	102.435	12.6189	15.1041	51.6944	11.7608	9.75149	5.89996	43.0548	31.7177
73	36.515	1.52146	119.501	42.2662	53.8524	28.914	67.5403	68.9558	51.7257	24.8937	16.585	29.8567	41.1165	27.3657	41.1666	72.479	11.6923	54.5311	8.52981	86.2439	18.7629	108.724	128.557	9.45966	33.7983	30.1602	25.7549	10.9238	21.6779	57.9053	6.75867	63.0293	5.50342	40.8437	89.0626	23.2295	43.9165	11.2893	20.0231	6.77023	94.1532	12.4632	14.6272	50.4002	14.0576	9.18691	7.53486	44.2619	34.3161
74	37.0152	1.5423	116.047	45.0882	49.6192	29.625	69.2333	68.6541	53.1663	26.7429	16.0693	29.2144	42.2843	25.5165	42.1685	79.6702	16.4318	58.7254	11.3615	87.0812	19.6875	113.443	98.9528	10.1406	29.2826	21.8977	22.5921	11.216	21.2014	53.6135	5.94134	52.0918	4.98773	41.1747	82.1917	23.9014	38.0285	13.7317	15.2543	7.66554	88.8106	12.8914	12.7294	51.5194	13.7265	9.62513	17.3835	44.1062	36.4667
75	37.5154	1.56314	114.821	48.309	45.8336	32.7488	64.0273	76.5658	52.475	28.9617	14.5223	27.9203	40.7856	26.3147	45.3121	86.8233	19.1659	65.4206	11.1473	93.1341	27.7548	113.852	100.004	9.97513	24.4073	19.5424	23.0202	13.0454	20.5495	46.9282	4.88052	47.1287	4.53019	33.2338	76.6739	21.6822	35.1966	21.439	12.9771	7.70446	87.0491	12.8233	12.0384	48.4151	13.7461	16.0578	31.8927	44.0476	40.8071
76	38.0156	1.58398	121.302	48.1923	44.7145	36.9818	62.4701	84.7209	65.3985	29.4385	15.2422	28.5044	35.6084	25.4388	50.4696	91.5427	18.621	65.3719	12.1593	95.3526	32.0855	110.504	96.3351	10.8025	21.0694	18.55	22.7088	13.0647	18.2234	47.0353	4.21874	38.6233	5.46453	30.3336	73.9978	18.6947	39.4494	36.523	12.4712	9.65077	84.694	10.2931	11.8534	51.0716	15.0014	20.9817	41.9848	42.7827	40.5443
77	38.5158	1.60483	138.332	45.4965	42.2524	40.2128	61.3508	75.9041	72.6294	28.903	13.8895	28.3971	32.0269	26.3047	56.6298	91.4555	18.6406	66.2089	14.6509	91.6057	37.5349	97.1429	88.8127	11.8243	19.9989	27.3958	20.529	14.3494	17.7174	44.1155	3.73248	30.6723	3.30401	27.7744	76.1001	15.7755	40.141	53.0567	12.8118	10.0303	85.5604	10.5558	12.2816	55.4705	18.057	26.3243	39.6586	42.082	39.4444
78	39.016	1.62567	150.808	42.8598	44.3642	40.7086	56.2026	66.0071	74.2157	32.2896	11.8946	28.9131	27.5021	25.0301	58.3616	86.4247	20.2368	63.231	14.6607	95.7029	49.8843	81.0082	82.5459	10.0433	18.1497	39.2977	19.7992	15.0697	17.6688	40.2814	3.59619	27.4025	3.4501	26.0715	76.1681	13.3717	37.0363	71.3132	16.0331	8.50245	88.6647	13.9327	14.1504	59.3144	20.7528	30.2168	35.591	39.97	40.6414
79	39.5162	1.64651	147.003	43.0734	48.4903	42.9276	51.5221	60.3044	71.7923	32.0078	13.8216	34.4697	22.1299	25.3706	56.7662	92.867	20.4411	63.1144	12.9479	94.6615	54.3804	75.0914	84.9593	11.0752	18.3152	47.2291	17.2982	16.1109	19.0895	43.5998	2.80794	23.2272	3.63508	28.3389	84.5662	11.7366	33.5712	78.9523	25.9395	9.18366	90.7862	14.6528	14.2863	61.8836	21.0741	34.4988	29.9663	40.3107	38.0237
80	40.0165	1.66735	134.556	46.0128	57.7645	46.9958	52.5048	51.2833	70.1088	30.6645	15.1744	43.3252	20.4953	27.0639	63.1495	101.333	21.706	59.3966	14.2808	94.701	59.0712	77.067	95.868	12.7489	20.4953	52.7855	14.6608	15.1184	23.9357	46.8989	1.89321	21.7971	7.64432	35.7443	92.4879	13.1185	29.3185	75.3225	32.09	6.32258	94.5132	12.6286	14.0917	65.3574	23.5264	37.8854	23.6403	41.897	39.7558
81	40.5167	1.68819	126.479	48.6984	61.8323	50.0313	50.9966	40.0142	60.903	27.5407	15.0865	45.3595	17.7997	26.1979	62.4203	110.899	17.8133	57.9858	13.6579	90.8175	58.9248	74.2643	93.0653	13.1381	22.6263	55.4325	13.4056	16.0622	27.4978	48.5045	1.71805	23.0326	19.5267	36.1921	95.8648	13.3426	26.3891	70.0191	26.5723	5.59272	99.1453	11.383	14.5199	67.3916	24.5091	39.1795	18.6578	41.0213	34.2775
82	41.0169	1.70904	111.317	44.7571	70.5712	53.9537	51.5317	31.1487	58.8589	26.947	14.6294	48.1814	19.0061	23.4436	57.4669	118.714	15.7408	53.0615	13.1811	85.8646	57.8547	71.4809	93.9609	12.593	19.8625	54.2359	12.7729	15.8579	30.3781	48.6116	2.27263	24.8621	26.903	32.7664	95.2805	11.5521	19.8694	60.9685	21.1224	5.14507	103.816	11.3149	16.2719	70.7682	23.7405	35.6275	15.2036	40.7	33.3432
83	41.5171	1.72988	93.3138	40.2317	72.5662	51.667	48.7291	24.4534	50.7915	27.1902	14.1816	49.3979	15.3473	19.5998	62.1476	121.234	14.1059	46.1035	9.76525	82.6433	56.0542	66.3813	90.7005	12.593	16.3982	51.2382	12.5392	15.5658	28.8989	53.9834	2.01968	28.6481	37.9872	27.9594	91.0085	11.2502	18.4875	50.3225	14.9138	5.56352	100.878	10.0011	14.4518	70.0191	22.631	33.3797	15.6022	39.0358	30.0927
84	42.0173	1.75072	82.8232	37.9253	68.1383	43.4533	47.9504	16.8823	49.0594	28.0276	15.0479	44.2208	13.0699	18.5293	59.0624	110.16	11.6241	45.2567	8.21809	70.294	58.312	64.3864	89.0463	11.5907	15.785	53.8079	11.7902	16.9769	25.9405	55.7448	1.63992	36.0246	37.6758	23.5896	91.0576	11.5907	20.2688	40.2014	11.4591	7.38332	100.333	10.6045	13.3522	66.8852	22.2319	30.8104	15.4758	36.973	26.7744
85	42.5175	1.77156	75.7289	32.6416	63.5548	41.2636	46.705	12.8632	50.4901	32.3773	14.3566	36.8735	13.2453	20.2516	63.6461	90.1803	10.4078	43.7387	8.65625	70.0216	56.4046	59.5016	96.1894	11.9021	14.6463	58.7999	14.5053	17.2106	29.0742	59.3166	1.4066	39.6736	35.5738	25.9352	88.8774	12.3107	22.2727	29.9931	10.6222	8.70681	102.289	12.9206	15.5223	65.5133	18.7188	33.5356	16.4293	32.7983	22.4339
86	43.0177	1.7924	63.3309	29.3814	65.3356	35.4928	43.883	10.8585	53.7985	32.251	12.3717	33.4574	13.5953	19.8044	64.5124	79.0186	8.8023	43.5537	9.25952	70.9167	57.0174	57.6425	101.288	13.2549	12.3889	61.7968	15.2449	15.3419	28.8114	63.3743	2.13635	44.3159	26.7183	23.5218	90.2011	12.9921	23.8105	20.5635	8.66625	8.17158	91.7008	11.8404	16.1255	68.394	17.2593	33.331	16.3714	32.6426	17.8406
87	43.5179	1.81325	56.6551	27.0261	81.0813	28.0485	40.9437	10.1286	50.2079	33.1851	12.5274	30.2559	16.8265	17.3715	61.5927	72.3334	8.46169	41.6269	6.5445	70.6347	56.4433	62.3529	90.2726	13.5663	9.78058	66.4491	14.5053	15.8579	28.8404	60.4844	0.910172	57.5897	22.9715	23.035	96.614	12.1939	23.8786	15.6391	9.25026	7.46117	86.4845	11.5484	15.5127	68.2576	13.5513	31.0636	16.0693	33.9754	18.4149
88	44.0181	1.83409	62.2021	26.9386	80.2833	23.0368	39.0756	11.5299	50.0422	38.1386	12.3424	29.3508	19.3466	15.3568	57.6711	64.9756	7.2159	38.766	5.71724	66.1092	55.0714	71.4709	83.0616	15.5905	9.84877	76.832	13.9017	20.1009	28.4317	54.7134	2.37948	59.079	19.4976	22.0131	101.519	11.1043	22.1461	12.778	14.155	8.6095	87.0491	9.85513	15.5127	64.5792	12.6366	29.594	16.0108	33.9461	27.7086
89	44.5183	1.85493	70.435	29.5178	84.8571	19.9712	38.0438	14.2158	43.2398	34.3429	14.3273	26.9375	21.0499	16.2719	55.326	61.9206	7.98485	34.6885	7.29383	69.1072	54.6918	78.3998	79.8497	16.8164	13.9458	77.815	15.8285	18.174	29.7065	56.2025	2.73962	58.2709	16.0135	18.4124	103.728	11.3279	20.7642	10.7829	23.2637	9.38802	90.2802	8.72628	14.7341	59.7716	11.6539	28.728	16.0108	33.9075	38.6658
90	45.0185	1.87577	81.0034	32.7386	86.2974	17.7618	42.4326	28.4823	48.758	34.3725	15.5929	24.7478	25.3997	16.4369	53.1654	60.2663	6.77775	35.6225	5.85348	73.3305	54.7114	87.6157	80.1711	17.3324	17.8288	88.7922	16.4223	15.3713	32.4413	58.6546	1.63046	50.4468	16.0135	16.5732	101.499	11.4352	22.7695	9.64468	24.7526	8.92091	85.2099	8.31755	13.9363	55.7523	15.0112	27.9594	14.318	35.5231	48.2909
91	45.5187	1.89661	80.0205	36.281	79.8454	16.6133	41.654	49.4343	51.9207	30.3822	15.8165	22.7141	25.9352	17.4297	50.5279	63.6233	7.62463	34.63	5.18209	80.3276	57.8156	92.1504	78.2148	19.1229	19.7166	95.196	16.4514	15.3419	33.9009	56.4261	2.22393	45.6394	16.0818	14.6077	100.438	11.4739	23.752	8.81735	27.1563	11.4219	81.3661	9.17393	14.9091	54.5845	19.6142	26.2465	14.5416	37.5566	55.9005
92	46.019	1.91746	75.5051	38.6947	71.5638	14.0838	43.3181	74.094	54.3048	25.1369	14.8922	22.0427	23.1323	17.556	46.4117	66.4065	8.23771	31.0001	5.78536	88.6866	60.2094	81.6503	80.6968	19.4539	22.1399	98.1149	15.8092	15.7798	34.6407	54.5969	2.59388	41.9803	17.5802	15.9018	92.4585	12.1553	24.9098	8.07777	26.368	12.1615	81.9598	11.0229	15.9409	54.945	23.1663	26.6843	18.5413	37.1381	66.0898
93	46.5192	1.9383	66.6202	35.3666	66.6786	13.9182	42.832	83.6699	52.2321	24.4169	16.2157	24.9815	22.2758	15.4736	46.5378	70.2111	7.35214	28.3726	6.58319	109.2	61.1535	87.5478	86.1757	19.7653	22.9573	104.071	15.5756	15.7507	33.9397	52.4264	0.900362	35.0709	20.5093	18.7143	86.7751	10.9388	25.4651	9.74196	22.2319	11.6749	80.3442	13.0471	12.6612	56.0346	26.3095	29.3117	24.2438	38.0337	78.3319
94	47.0194	1.95914	54.1249	35.1136	62.0464	13.6455	41.1872	87.4457	49.0495	24.8451	16.0693	24.9328	20.3785	17.3128	43.8814	75.0582	8.6072	23.682	5.80498	113.307	59.7325	90.1655	88.0734	19.9212	23.6873	101.93	17.7067	13.4736	35.4679	50.0815	0.79351	25.0186	23.0493	21.3808	79.5548	10.5106	26.1372	17.1087	16.4514	10.7018	74.7484	12.5994	14.1695	58.2729	28.8592	30.5772	25.4895	41.7413	91.966
95	47.5196	1.97998	56.0809	33.2155	63.4477	11.436	43.6299	100.885	47.4538	28.5044	14.0259	31.4237	23.4537	19.3175	43.0837	79.6803	10.7969	20.0812	7.33252	111.478	54.6236	81.2803	85.9808	18.7238	24.5533	94.1153	16.5099	13.9115	32.8598	52.4949	1.38698	21.8851	25.7742	19.8916	76.5476	10.452	24.356	30.3922	13.3958	10.2541	75.9262	11.3051	14.6272	62.1559	25.3752	35.2775	28.2828	43.5705	95.0309
96	48.0198	2.00082	58.2219	30.9382	64.5279	14.5307	41.0313	109.089	51.1907	29.4285	13.9381	35.2289	25.4779	17.1474	46.295	84.0494	14.4754	16.9282	5.88237	110.291	53.0276	77.6506	88.5499	18.2279	27.4143	91.3422	17.59	12.5588	32.8112	51.2493	2.09746	21.2327	29.8227	21.1567	68.6553	11.9507	22.0306	39.3646	12.6464	8.41487	72.0137	10.9061	14.2667	64.3551	26.9324	37.7104	27.6693	45.9553	83.6358
97	48.52	2.02167	63.0682	31.0549	70.1722	17.9951	41.3431	128.017	52.1636	29.3022	14.2594	39.8319	23.7259	16.7096	43.8908	75.9722	20.0324	16.6364	5.00661	106.622	47.2959	76.9306	98.0186	20.7676	27.2002	90.8267	17.3371	12.549	32.4119	55.0248	1.97099	24.2783	29.2583	24.641	67.6235	12.5248	20.5318	47.1886	12.9967	6.54641	65.3965	9.79674	15.24	59.9176	25.8229	39.9973	27.2994	46.8603	69.5832
98	49.0202	2.04251	71.2621	30.9193	73.0819	27.9019	39.2507	131.569	54.4991	29.1367	14.3566	40.3378	22.5486	15.7364	42.178	79.6998	21.8521	17.2495	5.44476	93.8348	44.1039	72.1037	110.3	19.337	28.183	87.7612	17.8041	13.6487	31.8572	55.2876	2.38929	29.4173	31.6325	25.9838	62.4466	14.6659	18.0297	52.2003	14.0965	5.90413	65.1238	8.50245	14.6172	58.3702	24.2075	36.698	28.0293	50.4994	60.2023
99	49.5204	2.06335	80.5363	33.809	75.0185	41.1075	39.4355	140.94	54.9469	28.9617	13.3738	41.2915	19.4148	12.7199	40.1056	88.2542	22.6308	18.1544	5.9603	83.5682	37.2235	69.8753	103.148	15.9991	25.5165	97.7554	18.573	13.8824	30.1251	53.847	2.65204	38.0682	29.6766	27.2293	58.3592	17.3419	17.1544	53.3681	14.6023	5.75815	65.9416	8.22997	14.0722	59.898	23.283	34.207	31.3284	56.2412	54.937
100	50.0206	2.08419	94.4135	34.189	74.2595	48.9609	34.0535	147.723	63.4721	27.1807	11.9724	44.1039	17.4297	12.8071	40.037	93.9078	23.0101	21.5509	4.84148	74.8676	32.5523	67.209	103.722	12.7976	25.1665	98.8448	19.9744	13.201	30.6605	46.6167	2.42818	42.8079	25.4337	26.6356	59.9648	18.8697	14.5465	52.9208	14.904	5.84574	65.3379	7.30547	13.3913	57.5624	24.1784	29.0394	32.2141	52.3585	51.6385
101	50.5208	2.10503	104.174	34.1015	70.3085	54.362	35.5722	140.891	60.2509	26.597	13.8409	46.5563	14.1113	12.778	33.6727	97.7911	23.3213	25.3752	4.02403	71.1987	30.8591	67.7633	107.468	11.5521	25.2638	87.5271	17.5122	12.3157	33.2199	44.3298	2.62296	46.1065	21.8329	24.1446	61.3762	16.9333	14.3127	53.164	14.4661	5.56352	68.5008	7.30547	12.9726	58.3506	25.0346	25.0983	24.8766	54.032	54.2363
102	51.021	2.12588	112.174	36.8454	72.9262	60.5025	36.5058	149.552	57.8175	23.5118	14.483	49.7579	13.1772	14.8218	37.1473	102.092	23.166	25.8912	4.9096	69.0774	31.0245	63.4428	110.757	12.4762	23.8914	80.5108	13.9602	11.8483	31.5168	40.2036	3.41122	55.5165	17.0936	20.7189	66.8455	15.24	12.434	49.6315	13.2497	6.17661	72.2278	7.78232	11.688	62.1654	26.5624	25.4292	19.787	54.4506	57.2632
103	51.5212	2.14672	115.803	33.128	77.9477	73.0854	39.552	139.568	52.1343	21.6044	13.0917	43.4521	14.0431	14.374	39.4435	105.751	21.1709	26.8837	4.67581	62.9763	31.2	58.3724	112.032	12.1262	23.7164	75.4794	12.0722	12.3252	28.3929	44.0283	2.9733	61.6575	16.0037	18.5293	69.6676	13.7608	10.2743	46.9164	12.7049	6.20581	69.7759	7.04272	10.0338	60.8031	31.9926	26.9084	16.2251	59.2388	65.3499
104	52.0215	2.16756	115.093	34.4806	80.7601	79.2851	42.0534	123.209	45.6532	19.5416	13.1016	39.9191	14.3545	15.6	40.923	97.0702	20.5093	30.5815	4.43276	62.6838	28.9812	58.1875	102.456	11.688	21.8185	75.3335	10.7294	13.8824	26.7678	49.6044	4.54	65.5797	20.6943	16.5246	68.7915	12.7098	7.67612	43.0916	12.0137	4.9407	68.5594	8.56084	11.0166	57.8838	38.902	31.0636	15.1744	59.6474	71.948
105	52.5217	2.1884	116.728	36.7674	96.0776	83.2452	42.9678	105.04	40.6321	17.1865	13.6366	38.0117	15.9018	15.8241	41.4196	92.1468	23.0101	33.8417	3.85836	69.0678	29.8763	52.115	96.2479	12.2621	18.5975	75.6938	9.88262	14.5634	24.9968	49.6144	6.55443	71.7877	24.6258	17.7024	70.2708	13.3131	8.48326	42.2743	12.3739	5.92359	69.2308	9.8454	11.873	59.6548	40.8971	39.355	11.2332	63.0629	75.0036
106	53.0219	2.20924	114.47	37.264	116.329	82.3695	39.7955	94.5205	41.0992	15.3568	14.1623	39.8123	18.7238	17.4883	41.6916	86.3274	26.1633	31.4479	3.37171	76.1428	38.4595	50.4508	98.9142	12.2621	15.5709	74.2922	9.76595	13.9406	22.768	49.2151	5.20178	63.3119	29.7932	18.9575	68.1299	13.7608	10.888	37.1067	12.6173	6.02091	72.4715	10.4877	9.73194	55.3923	42.3275	47.4614	11.3303	69.1939	75.13
107	53.5221	2.23009	109.828	36.5538	113.954	71.9566	42.4817	83.4363	39.2793	15.9214	13.2766	41.1456	21.8381	21.7699	39.259	77.8609	26.6205	28.0612	3.88779	85.495	42.2843	49.643	96.5008	12.953	13.9554	75.4991	8.56886	15.3128	21.6293	46.2275	4.81256	59.9058	31.506	20.5048	68.4021	13.1381	15.092	31.8714	12.1987	7.40279	78.0963	11.529	10.8611	55.1687	37.7441	54.9059	15.8165	72.6873	70.031
108	54.0223	2.25093	111.872	34.9772	111.891	61.4957	39.0756	68.4497	41.6828	16.4855	14.2109	43.1889	23.6287	22.0522	40.6409	77.8119	26.2995	23.6042	4.9581	101.328	47.6169	50.9765	98.0186	13.8094	13.8195	70.5457	9.18194	18.4368	21.5615	44.2133	7.16752	58.2904	40.3618	21.5754	67.8571	12.8753	19.9571	25.9447	11.5274	8.32728	86.2804	13.1055	11.4252	55.5191	37.0921	58.9152	18.3756	72.5416	65.8562
109	54.5225	2.27177	115.774	31.7556	113.818	55.0336	34.8417	54.5044	42.7048	21.0012	15.1544	45.554	22.6359	19.7262	39.2882	74.8441	25.6281	22.6506	5.40552	112.616	53.7772	57.9053	106.174	15.1718	12.7489	68.1517	10.3889	21.2783	25.0548	45.7996	9.20156	56.1004	46.4247	23.6482	67.653	14.2768	23.5767	21.4099	10.7196	7.62661	91.3116	14.1467	11.9412	57.5333	37.6467	59.5866	22.3854	66.3813	61.1459
110	55.0227	2.29261	112.436	30.1894	105.965	49.4283	35.7377	41.542	43.4833	24.9228	15.028	42.5661	22.3731	22.4027	39.2196	72.6635	23.4575	25.599	7.49819	109.347	51.1202	61.3308	110.349	15.9896	12.4376	67.8112	14.9138	19.8479	26.9914	48.2417	11.0114	54.5729	44.2642	25.2828	67.3029	13.9849	25.0072	18.9479	9.9215	7.64607	84.3826	15.5092	12.0094	59.0321	42.7266	58.0979	27.7279	67.5104	56.144
111	55.5229	2.31345	114.149	31.5129	104.291	43.2784	35.8735	32.1121	42.5784	27.5602	13.948	39.9873	22.6359	23.0545	37.7992	76.7126	21.482	27.8082	5.2889	102.466	53.5531	63.8613	118.708	16.476	14.3154	65.3684	15.4004	11.5663	29.7065	45.4683	12.802	51.634	37.5104	27.8521	66.417	14.6854	25.8937	19.9889	10.3303	8.19104	76.4808	15.3145	11.6393	64.151	46.7554	56.2196	31.3091	68.7561	55.1319
112	56.0231	2.3343	111.327	32.5344	107.454	37.0015	34.5991	24.8038	41.235	26.9761	15.4565	41.9724	20.3589	21.799	36.6704	76.683	21.5698	34.2698	6.37883	96.725	52.8426	61.5544	117.832	17.7511	14.3254	67.1499	15.7994	12.9288	30.0278	48.7866	13.5321	52.8213	35.4767	29.4385	63.663	14.6077	27.2658	21.5463	12.082	4.9699	69.474	16.4142	10.8997	67.5471	47.7966	52.794	33.7711	69.1646	57.3218
113	56.5233	2.35514	110.149	31.1132	108.047	34.0526	33.7128	20.2494	39.6978	29.4385	16.1379	38.1968	17.6242	20.6994	37.0401	76.8099	19.5746	38.6879	7.53689	89.7963	49.972	59.1703	119.087	17.4201	13.7026	62.9453	15.3226	14.7582	29.2884	51.6186	15.7315	56.1401	28.3239	30.3336	66.6119	14.6077	30.827	25.3415	13.2791	4.4444	60.8131	16.0833	9.91696	69.99	47.2421	52.0057	36.6417	70.4296	63.4135
114	57.0235	2.37598	105.42	31.1818	103.289	36.6215	30.0448	17.5927	37.7316	26.7038	15.515	36.6399	15.2304	16.8846	36.6507	79.2132	19.137	38.8536	6.6317	89.5528	54.1468	54.3048	100.169	16.5346	14.4031	63.8605	15.1863	19.5459	31.5266	55.3069	16.5197	56.9762	24.4117	34.6738	64.5293	14.6368	32.2868	27.4434	12.5003	5.07695	53.7381	14.9155	9.95606	74.5634	47.2032	48.5996	39.7072	69.2525	65.9434
115	57.5237	2.39682	104.233	34.2662	103.551	39.1424	26.6579	16.3373	35.056	25.6138	16.9743	34.5866	11.6493	14.4518	36.8454	81.0918	20.5382	38.3572	6.47638	90.0494	50.702	55.6769	94.4181	13.9363	14.7341	62.537	16.8701	21.2394	28.4804	59.141	16.4416	53.9595	22.3973	32.4651	64.7236	14.5395	29.864	35.0825	11.4399	5.4954	52.103	13.3098	10.1601	75.5467	45.3737	47.8701	42.627	68.9996	66.3427
116	58.024	2.41766	98.6759	33.4007	104.009	40.1734	24.2835	17.544	33.3432	25.1665	15.6022	35.8516	9.48875	13.9363	33.6341	80.5266	20.2559	38.4059	7.25459	100.267	45.3785	54.9083	90.0098	11.1239	14.4713	60.1431	18.4171	21.9983	29.9791	61.5644	16.4321	53.5998	17.9792	31.2486	62.7967	13.1967	29.562	41.301	8.67606	4.21084	52.1226	12.5994	9.44011	69.4349	47.894	45.0381	40.5835	70.1282	66.7419
117	58.5242	2.43851	96.6907	31.9992	108.534	43.0837	26.9986	20.045	35.2895	21.6335	16.5271	34.9852	8.19459	11.873	31.3473	79.3985	19.8864	38.8438	5.78536	107.498	45.3595	55.8326	82.0103	11.182	15.1527	63.7824	19.6044	20.5969	28.753	58.1289	15.3226	60.791	13.7654	29.7304	61.3762	9.72241	30.4665	40.8342	6.77829	5.10614	52.5994	12.3075	10.647	65.3379	44.556	46.3132	39.3279	72.8237	65.1848
118	59.0244	2.45935	89.4991	30.9674	115.988	43.9492	26.5116	23.2272	34.6954	22.6845	17.0328	34.2752	8.26278	12.5444	31.4734	73.5199	21.0052	39.9141	4.59788	111.994	39.4909	59.1317	87.4307	12.4276	13.5081	62.5851	21.979	20.9378	28.4125	57.711	13.8046	66.5326	10.5931	30.1195	65.6193	8.18458	28.6087	38.294	7.34268	7.86017	50.5461	10.0108	10.9875	58.7207	40.2063	42.362	38.9287	75.4221	55.8326
119	59.5246	2.48019	86.638	36.2716	127.082	41.7018	26.4731	23.9377	34.1703	22.8309	15.1258	33.1365	7.21181	11.182	30.0238	69.9682	20.2172	40.1379	4.57881	123.029	36.0853	63.8707	93.2603	14.9577	13.8094	67.3052	24.9372	20.0325	29.7748	61.1652	14.0281	64.626	7.59563	30.5477	61.7262	8.25277	27.8781	34.2361	6.29168	8.70681	54.3122	9.52426	11.2307	54.215	39.4958	38.5277	36.4374	79.344	54.4605
120	60.0248	2.50103	88.0783	37.4098	132.24	39.2977	27.6502	24.2101	32.4376	22.675	15.3687	30.6841	4.91485	10.7052	28.3598	66.4649	22.6891	39.8948	4.41314	135.709	34.6447	65.4377	98.4664	12.6612	14.0526	65.5048	25.2487	18.5436	32.8692	62.0122	10.1261	61.6871	6.91457	31.7255	60.3443	7.15316	29.2795	31.4332	6.75867	9.26151	53.1444	7.74339	11.2307	52.7453	45.3348	35.803	35.046	80.3168	53.6334
121	60.525	2.52187	90.0538	38.5583	131.15	37.6825	28.2826	30.594	32.0683	24.9328	13.7145	26.5775	5.61581	11.1625	28.739	57.8622	26.7371	34.1045	4.28671	136.294	31.4141	63.0336	100.053	10.7538	12.1844	64.7457	27.0004	20.928	33.1615	57.8275	9.18194	67.3407	7.35249	31.2	65.2883	6.28721	26.3599	29.3022	8.23814	8.31755	53.2904	7.30547	10.2574	53.3099	41.7533	31.4332	33.6833	82.6524	46.9867
122	61.0252	2.54272	83.0081	38.2761	125.019	33.7121	27.0564	38.3793	28.8471	27.1902	14.9987	26.0615	5.09033	9.99468	28.9826	51.1474	25.2483	33.5012	3.82948	134.425	28.4066	60.2801	105.512	10.277	10.9288	63.0234	25.5699	22.0179	34.8254	53.1271	10.0578	68.187	9.06528	26.0324	66.4366	5.48897	25.582	31.3459	9.94112	9.44641	52.804	7.83097	8.34051	52.619	36.4889	30.655	32.9733	87.5864	41.9848
123	61.5254	2.56356	78.7846	38.9768	121.02	31.892	27.2903	49.5316	24.9352	30.6354	16.9064	26.3925	6.60813	9.24556	28.7004	52.9676	20.7327	35.9535	3.08015	130.241	25.1178	68.6296	104.227	10.5202	8.06775	67.8987	22.2418	19.04	35.1565	46.8796	8.59794	63.1951	17.7848	23.765	66.5433	7.43545	25.9521	33.4188	12.549	9.96218	52.1908	8.27862	6.73497	55.4996	37.413	29.8372	30.7741	94.5738	34.4132
124	62.0256	2.5844	76.8675	37.3223	123.083	32.2522	28.0882	56.5091	28.3314	27.8521	17.0036	25.3024	5.83945	8.28186	27.9996	49.8535	21.4433	36.0313	3.2747	123.419	24.6019	74.2543	99.362	10.822	7.85365	73.7862	21.5215	17.6289	35.4483	44.6025	7.85838	63.234	22.5238	27.4725	62.5827	7.47456	26.8762	40.8537	17.2982	10.0108	50.2738	9.80648	8.46687	58.4093	37.7441	30.0613	29.09	96.4616	24.711
125	62.5258	2.60524	74.785	34.8117	104.359	33.2644	29.5963	71.8947	29.5085	26.2661	17.4613	23.58	4.8953	8.49596	27.4935	45.6877	22.2804	33.5888	2.76843	120.849	22.8113	73.2908	93.4253	10.9484	8.44732	75.7616	17.0452	16.8795	31.8769	49.0202	6.74921	72.6541	27.6036	28.2026	58.3788	9.12873	26.7495	46.4781	20.4025	10.7504	49.6997	8.44406	7.93185	57.4752	42.3959	29.9054	26.638	101.113	20.0205
126	63.026	2.62609	73.6074	29.5272	99.6393	36.0477	35.7377	81.091	26.5408	22.2468	14.6294	27.0252	4.76893	8.20413	25.3132	43.8099	22.0466	36.0411	3.67362	107.702	25.3219	77.2713	86.565	10.637	9.45966	79.6642	14.5148	16.9867	29.2786	52.4557	5.44492	70.7468	32.5083	29.9931	57.0361	10.3843	20.5416	42.8875	20.2858	10.7602	49.5242	6.64372	7.56182	64.0437	47.7676	29.6135	26.2194	107.225	15.6801
127	63.5262	2.64693	71.3011	25.6443	103.123	37.0306	35.7955	89.9856	25.3045	16.0187	14.1037	27.5602	5.45035	7.66911	24.5936	46.6032	19.8864	32.5767	3.91667	105.659	26.7038	73.3786	93.8831	7.98049	9.69332	86.0972	13.7948	15.0403	28.7334	55.7448	5.65932	78.5024	35.428	35.0634	56.656	14.8704	17.9907	40.9119	19.5267	9.28097	49.2033	5.80681	7.6982	57.1151	48.9741	30.6936	25.6552	109.852	11.9239
128	64.0265	2.66777	69.3158	25.5954	100.223	39.609	38.4038	84.0299	20.8869	13.9849	13.5002	25.2928	6.12174	7.28954	23.1432	48.277	20.4995	28.6546	3.87798	95.5278	32.2023	73.4565	98.2328	6.83224	8.9728	88.2672	12.0431	15.089	29.0934	55.774	5.70767	76.6737	30.1341	37.4281	48.8128	15.4446	17.8558	38.7127	16.4514	8.69708	49.8161	5.42728	7.26999	46.6732	52.867	35.6862	23.4267	114.874	9.84116
129	64.5267	2.68861	65.9098	23.825	87.6695	42.684	35.0467	75.4954	21.4119	11.6684	14.8629	25.2051	7.00725	8.42825	23.2598	53.3662	24.2461	24.5676	4.30632	91.8886	35.0243	66.5083	91.1875	7.59091	8.71006	83.5566	11.7706	14.9334	29.9988	51.2393	4.71517	79.7971	31.4184	38.2745	42.1663	15.7268	18.02	35.4621	15.7896	9.22258	54.0495	5.5246	6.89996	39.4327	50.2686	36.2016	22.9397	115.341	8.69268
130	65.0269	2.70945	64.2165	23.5326	77.2957	43.4139	34.015	65.5108	20.1762	9.90742	14.7652	24.3101	7.49363	8.22368	24.6322	50.2327	23.5649	24.8983	4.70524	88.4046	38.5182	63.1893	83.4023	7.13361	8.30141	78.6229	11.0212	14.0576	27.2738	50.8108	5.55212	85.0327	30.64	40.5033	41.0468	15.96	18.2732	37.204	19.6629	9.04742	59.3825	4.81419	6.4913	34.6447	50.6382	33.2142	23.2318	119.36	9.10187
131	65.5271	2.7303	59.6816	22.8223	74.3568	48.3382	36.5356	56.8011	20.6819	7.90229	15.9043	24.3973	9.4692	9.78058	26.1898	47.7998	26.7083	26.6987	3.71231	91.343	38.2454	54.7327	77.8162	8.0873	9.76103	72.2491	11.7902	13.6876	30.1545	54.6162	5.38676	84.7018	22.1153	39.89	40.3951	15.6782	20.298	39.5691	23.2244	7.73366	66.2238	5.92359	6.73497	32.2119	55.2122	32.611	25.1102	123.341	10.8532
132	66.0273	2.75114	59.6621	19.6205	73.335	51.7734	33.4702	50.5437	19.242	8.89508	14.9115	20.6703	12.4276	10.462	25.2943	49.7656	26.9906	26.7961	3.29378	107.011	39.4423	51.6871	65.7491	5.6449	9.1192	66.5264	13.386	12.335	35.9833	51.8328	3.81025	84.0494	17.7942	42.3034	37.028	14.1208	21.2221	45.4858	30.0465	7.46117	69.114	9.31017	7.3768	27.0348	55.4553	32.2605	21.6261	131.904	11.0482
133	66.5275	2.77198	55.3511	21.5864	77.0232	50.7613	29.4115	53.395	19.7284	9.78058	15.5437	21.1181	13.8195	9.80967	26.2087	49.2307	32.2549	27.7788	2.00929	131.087	40.9119	57.8761	66.9362	6.11173	7.72728	65.4173	12.5101	11.3912	36.6647	49.3708	2.89552	88.0494	17.4733	41.0774	37.1641	13.5953	22.2143	55.0909	35.866	7.42225	73.4638	10.0108	8.01911	25.4097	50.0058	31.9587	20.5362	136.877	12.4981
134	67.0277	2.79282	55.7306	19.9129	74.6001	49.37	27.5627	60.5477	26.9687	11.1529	16.7607	21.9645	18.3056	10.3061	26.5011	45.6199	33.2282	27.1174	2.41802	148.555	41.9433	58.8396	74.4779	7.10452	9.03146	65.2612	16.4321	10.4568	34.7866	57.711	3.66416	88.7984	16.5001	41.2915	36.8429	13.1867	22.1558	51.9962	34.8538	7.65581	77.3372	8.96956	9.43058	25.4192	42.5805	29.5358	20.5655	135.125	14.5902
135	67.5279	2.81366	53.1907	16.9349	71.846	46.645	28.6531	81.3927	31.6791	12.2134	16.1279	22.3149	20.0475	12.8949	27.0844	46.9629	30.6783	31.5842	2.90467	156.934	40.0555	59.9488	74.6536	6.85132	8.72961	65.2715	16.0913	8.95808	31.5168	57.0782	3.23605	84.4488	18.5342	33.6229	36.2494	11.1043	20.5221	49.3688	31.0001	6.02091	76.0526	9.10581	8.76871	31.2291	38.5225	27.1711	21.2468	136.264	13.8216
136	68.0281	2.83451	52.4413	17.9856	80.585	43.4723	25.0034	104.573	34.5889	10.5688	16.2736	20.9526	22.2859	15.055	26.647	44.4817	29.3939	35.5738	3.43002	174.81	34.7129	57.3703	78.2148	9.52785	8.59324	61.5832	16.0913	9.19175	27.3907	50.9179	2.44779	89.2663	19.7603	30.6159	33.6898	10.4329	20.959	49.4174	27.9638	4.11352	76.7631	10.5558	7.70773	38.5472	34.0558	23.4732	21.8011	138.59	12.2739
137	68.5283	2.85535	55.244	23.6689	82.8135	47.0344	23.0959	126.352	36.1459	13.0699	17.6171	19.9112	24.3783	14.5104	28.4568	41.679	28.917	36.664	3.32321	173.487	36.0171	60.5423	80.249	9.94605	10.3061	62.3321	16.1596	9.37673	27.6727	50.2658	2.3991	81.9186	22.9813	27.5312	32.7554	9.08963	23.1884	49.4951	21.9888	6.33232	74.447	10.838	11.0361	44.7267	34.844	19.5802	23.456	138.259	11.2911
138	69.0285	2.87619	50.8356	27.3666	85.8497	51.5306	18.9111	128.055	34.8318	13.7804	15.6901	17.7511	22.4804	11.8439	29.8	39.7226	30.5617	34.63	3.43983	173.254	36.2698	56.5719	72.9016	10.5397	9.35237	64.0938	16.9576	9.01659	24.3445	49.6044	3.05107	82.5702	25.4627	23.94	31.6948	8.92417	22.8864	48.7069	14.4177	6.81889	72.1405	8.7944	12.2235	49.7188	35.4862	18.9575	26.4044	134.833	9.85112
139	69.5287	2.89703	47.8481	27.153	82.0155	56.3185	17.374	118.927	33.8197	14.3645	13.948	15.8532	22.2272	11.1429	30.8121	39.8487	27.662	32.4404	4.48126	163.512	40.9315	53.1563	69.2718	9.33282	8.44732	62.7215	18.3684	8.46201	23.4396	43.8819	1.8249	81.8111	24.7621	21.5849	29.9334	9.9265	21.4559	50.3029	10.5153	4.76554	71.8583	7.38332	11.9993	51.8794	36.7611	19.1425	24.9931	130.172	7.79769
140	70.029	2.91787	48.2665	26.1212	85.7816	54.3234	16.9948	107.678	30.7741	15.5614	13.1303	15.4736	22.1399	12.4762	30.1697	40.4233	24.6156	30.7083	5.43495	147.387	42.5857	55.609	68.2497	7.34771	8.36006	63.6555	19.692	9.396	22.6998	37.3523	0.832397	78.191	22.8352	22.3054	32.425	9.5083	22.7111	43.1502	9.47377	5.83601	74.0479	6.48802	13.5081	51.5484	37.8804	21.0594	23.2417	126.756	7.55417
141	70.5292	2.93872	47.488	29.2939	79.1836	51.89	18.0747	100.35	29.3821	15.785	12.3617	17.8188	22.6459	13.8486	30.0822	38.6809	26.4456	27.487	6.42733	142.667	45.1454	55.1319	75.0036	6.02447	10.2283	61.7582	23.7405	10.1356	24.9968	32.7005	0.482062	75.1843	21.2006	23.0545	32.6585	9.69332	21.602	39.6955	9.396	4.92124	75.4494	8.18131	15.0259	47.7337	37.6176	26.5675	18.6578	124.265	7.93409
142	71.0294	2.95956	53.4145	28.4765	76.2836	53.126	21.5973	93.1484	32.5448	12.4571	16.2643	17.8383	21.9645	14.5591	31.2307	36.6669	25.0734	25.1709	10.0187	138.746	39.6469	52.4457	73.5437	6.4913	10.997	57.9336	22.9228	11.7415	24.4417	30.5792	1.47456	73.0239	18.3492	24.5432	32.7364	9.61512	23.2566	37.3208	10.6709	3.6756	77.9113	10.0887	16.0478	44.4544	37.851	30.7523	16.2543	117.151	7.9727
143	71.5296	2.9804	63.983	31.3765	74.4249	54.3912	23.0766	81.2856	33.0605	13.3231	17.8992	18.072	22.6554	14.4131	30.7829	38.7783	29.3939	23.7794	13.2983	135.427	38.0604	47.4245	85.5236	8.44732	10.2574	56.6298	22.4169	11.5274	23.5466	26.5501	1.91248	64.032	17.5609	23.95	32.97	9.91696	26.0885	39.6273	18.2322	3.91889	79.4487	10.8867	15.1818	37.3017	40.0017	38.109	17.3343	114.903	7.1456
144	72.0298	3.00124	68.0215	30.7246	71.8655	57.9628	23.631	80.6336	39.9214	12.8267	17.0135	16.661	21.5558	14.0917	30.5977	41.8635	30.2505	23.8862	11.926	126.007	40.2114	48.0573	99.5271	10.7634	9.88787	53.7976	19.9257	10.0676	23.9067	25.1588	0.851666	62.5629	16.9965	24.9133	31.8407	9.58603	25.3677	40.3864	23.3996	4.29842	82.0957	10.5266	15.24	33.516	39.5445	41.2233	17.4028	116.071	8.77053
145	72.53	3.02208	70.1333	33.05	72.7121	62.9942	24.9159	78.2786	39.4444	9.86832	14.3759	17.0305	20.4076	14.7631	30.2666	43.7515	32.9361	24.0712	13.5413	119.983	42.0797	50.3051	94.7195	14.1504	12.0871	54.6253	17.9211	10.7585	22.7488	29.3435	1.58177	62.6501	17.1619	21.1762	33.184	9.37192	25.0072	41.2719	32.9368	4.42493	77.0158	9.64104	15.3373	32.3192	33.2675	47.5782	16.6828	114.378	10.6197
146	73.0302	3.04293	75.1645	39.7454	68.9071	67.451	23.9139	73.9772	41.4006	9.70286	14.0938	16.4469	21.3613	13.8486	29.5659	43.6059	34.0942	24.6552	14.5533	120.158	40.7465	51.9007	94.5152	18.072	13.1772	53.2041	18.174	10.9144	19.2064	29.7421	1.14385	64.3535	21.3074	18.257	35.3151	8.85598	23.3248	44.1426	34.0169	3.50044	75.3421	10.7407	20.2225	29.3022	28.9566	40.9315	14.9501	118.134	10.9604
147	73.5304	3.06377	82.4145	43.5117	68.8682	71.6264	22.7849	68.0994	41.7021	10.1215	14.5808	14.4518	22.3636	12.8071	27.4841	38.0488	31.3792	30.4358	13.5315	111.867	38.5277	52.3971	97.2015	17.5269	11.7662	52.1242	17.0645	10.6611	17.9316	33.314	0.705926	66.8246	25.0637	18.1793	36.4732	10.2379	20.8714	44.3567	34.7855	2.28399	74.3107	10.0595	24.5728	27.1711	27.9932	39.2091	12.7802	116.402	12.2353
148	74.0306	3.08461	91.9903	41.7988	69.3742	73.0176	24.3807	66.2893	37.9652	10.0729	14.7365	13.6635	23.6873	13.8195	28.0382	36.0635	31.8854	29.8419	14.252	120.421	42.4593	51.1907	88.7542	16.1937	11.7271	53.1363	15.6243	8.70514	16.9874	35.9703	0.978137	64.8105	27.2438	17.8288	35.7044	8.88554	20.8129	43.413	33.1214	2.91654	70.6614	8.38567	9.36239	27.5211	27.886	40.0069	12.2353	111.741	16.7314
149	74.5308	3.10545	98.5981	44.8549	72.391	76.9881	28.5848	65.4135	37.1381	10.0629	15.0865	13.8776	22.7336	12.8071	29.7511	35.7716	33.3258	31.2822	14.1838	124.975	40.5419	49.0694	85.3386	14.1695	10.1115	53.506	15.7118	8.38388	15.3427	38.7829	2.14616	65.1904	24.9957	15.9309	31.4906	7.89275	22.302	40.951	29.3262	3.57829	69.5131	7.36386	10.4815	30.5868	26.5723	37.5254	11.836	106.836	20.5555
150	75.031	3.12629	102.024	45.1079	75.9625	76.8809	31.7667	74.639	42.3542	14.5199	12.9845	13.5272	24.5628	16.2619	30.3935	39.3917	38.7264	32.061	12.8307	122.173	38.7418	45.6725	85.6986	12.1648	9.78058	52.4938	16.8406	9.76595	15.6055	42.8506	2.40891	58.2413	25.5798	15.6682	28.717	9.16783	22.6624	39.7928	29.4429	3.99674	69.3667	7.1303	10.8902	32.8055	26.5821	36.1239	14.7558	103.157	24.8667
151	75.5312	3.14714	104.525	47.6374	70.9215	72.0639	32.6618	83.339	37.6737	17.9356	14.7459	16.4078	24.2805	15.5709	30.3738	39.0515	43.8845	27.954	12.4808	114.884	40.8728	43.9891	88.4627	12.8462	8.87553	53.8268	17.8528	11.3327	12.3263	41.9163	2.48668	56.0226	25.5212	15.2595	25.3401	8.82689	18.9259	38.3818	28.8298	3.08198	67.7126	7.82124	9.43058	35.1216	30.5135	41.9724	19.242	96.0144	28.0001
152	76.0315	3.16798	107.931	46.7033	69.7343	72.2199	36.0977	82.1615	35.766	19.2202	16.3808	17.2256	25.0301	13.4108	26.3451	39.2648	44.4682	26.6308	11.0012	104.579	42.8584	36.6323	87.46	12.3694	9.6833	50.5374	17.2495	10.9045	13.3673	40.1064	2.74943	52.432	21.3561	12.5835	24.99	8.89508	15.8992	36.163	28.2654	3.8605	68.5008	8.29809	8.36959	40.5715	31.5645	47.2859	19.3391	92.8224	33.4011
153	76.5317	3.18882	114.898	43.9492	63.039	67.1199	35.27	81.2175	32.3891	17.916	14.9894	17.0305	26.2856	11.8243	27.9413	44.6172	44.1859	27.5844	10.6023	100.861	43.5684	36.6909	86.0779	11.8243	9.19692	50.3821	17.191	10.2816	15.6836	38.0237	5.5325	48.4319	18.427	12.4862	24.8926	8.46687	15.7823	38.3427	30.4063	4.55144	66.9243	7.96721	9.27465	43.6171	25.1905	48.0064	17.9378	91.5569	38.2087
154	77.0319	3.20966	116.173	44.6208	55.6528	63.948	33.1777	77.1692	35.406	17.8674	15.1058	17.1474	26.8497	13.6054	31.1235	45.1629	47.7085	24.3536	13.1326	94.6712	40.0069	35.1046	83.1781	13.1576	9.77104	49.3022	15.7409	10.3205	18.6616	39.4836	6.30149	47.2548	18.5243	10.8315	24.7368	8.95373	14.1471	38.8486	28.6158	4.36654	64.2192	10.4585	9.72241	48.0064	25.2294	48.5319	17.0621	87.2557	43.7169
155	77.5321	3.2305	112.65	46.0317	51.2541	57.3203	27.7965	65.394	31.4063	16.8946	12.3717	15.6	26.6066	11.6589	22.2383	45.1139	49.2949	26.4458	13.1228	92.0148	34.1779	34.9974	77.3977	14.199	8.34051	49.0878	15.5952	12.0624	19.3719	41.1085	5.18216	44.1703	19.6822	10.9484	25.3597	9.80967	12.6483	39.345	25.852	4.16218	60.1417	12.2491	8.24323	49.4465	28.47	49.9815	13.6073	89.8348	47.3174
156	78.0323	3.25135	115.336	46.9564	51.7893	53.2435	26.22	58.29	30.7741	17.9551	12.6632	16.0769	27.9203	10.0824	28.9629	43.3233	48.653	28.4213	12.2666	91.5383	37.0972	39.6393	78.3805	12.9044	8.74916	49.6813	17.5122	14.0965	17.9606	39.6779	6.2626	44.0239	19.7603	10.5688	27.1892	11.6198	14.7121	40.6201	26.2899	4.56117	58.1852	11.1008	9.26511	52.7258	33.6862	50.5366	12.4009	94.8267	52.0764
157	78.5325	3.27219	111.473	46.8689	54.0665	44.4844	25.5675	50.0182	26.9979	15.7168	14.7166	16.9042	28.4167	10.4033	30.7632	43.1676	49.4508	28.5671	12.2666	90.3796	33.4674	43.2205	85.6793	13.3812	7.93185	49.5647	19.9061	14.7582	17.0847	39.4251	5.79525	40.5696	20.6264	12.0966	26.985	12.5153	15.49	39.4423	26.6111	4.97963	58.7693	10.4585	8.76871	61.2604	35.3208	46.1181	11.1939	94.3795	56.134
158	79.0327	3.29303	107.123	43.2492	53.3269	39.9204	29.0708	46.145	25.0709	17.0015	15.5929	13.5272	26.3829	9.40101	28.1746	42.593	51.3189	26.7376	11.3517	85.8935	33.5938	45.7504	81.1639	14.2181	6.97816	50.178	22.2905	14.2909	16.5301	34.5982	4.48149	42.0971	22.6895	11.6102	27.958	15.5418	15.3147	34.9175	26.835	5.17426	60.9685	11.5776	7.83457	62.4382	35.866	42.352	11.661	92.1018	59.3652
159	79.5329	3.31387	107.269	42.8401	56.1393	37.4003	35.1141	44.7923	25.7816	18.9479	15.3494	13.8385	27.4434	9.19692	32.067	38.7401	49.9565	23.5457	11.7119	84.084	32.1241	48.7287	81.5432	13.3913	6.00492	53.8757	23.9836	13.5321	15.3137	33.6254	4.30632	43.4401	24.8108	11.0943	26.722	15.1136	16.6868	33.0392	27.1366	7.06218	60.239	11.9863	7.63954	65.1629	32.9368	37.4376	12.1867	92.7246	57.9832
160	80.0331	3.33471	109.03	44.7666	57.1417	43.5211	37.9168	46.7776	25.3531	19.152	14.1623	12.9726	27.648	11.0652	30.6466	39.5762	49.811	23.0398	11.7217	91.8983	30.9859	49.8479	86.7985	12.233	5.59626	58.8196	25.2781	12.2183	15.9656	34.4618	3.97561	42.9535	25.3072	10.4424	26.0311	13.9945	19.5967	33.4479	29.1122	5.54406	61.134	11.2662	6.92952	62.8955	26.1441	36.6594	10.9118	92.7539	65.4084
161	80.5333	3.35556	108.047	49.4189	58.1051	44.8549	39.7464	42.4762	26.1316	21.439	13.3738	13.1867	29.3704	13.3326	30.0333	38.8857	42.9597	22.5532	10.9233	98.827	26.2661	49.4973	91.2261	11.7075	6.05356	58.5957	24.2755	10.9627	15.3039	34.3746	3.47918	42.2139	29.6086	11.6684	26.7803	16.301	22.3799	30.5963	31.506	6.52695	67.8489	10.4682	7.99003	58.2147	24.9372	35.9685	9.96759	92.4525	68.6296
162	81.0335	3.3764	104.972	55.2188	59.4578	46.4408	39.4163	37.2991	25.8694	21.449	12.1867	13.7899	32.4746	13.4203	29.8678	39.2843	45.4317	23.0202	10.1353	98.6326	25.7597	50.3829	88.3749	11.4934	6.72495	57.2912	21.2783	10.1065	14.9634	36.8659	3.71286	41.9609	29.5403	14.3545	26.0991	16.3396	22.1364	30.4213	33.7639	7.12057	64.9588	10.9645	6.9877	54.4195	27.0781	34.8393	8.43982	90.0197	66.3234
163	81.5337	3.39724	101.303	55.9291	64.2944	46.9958	41.6829	31.5088	26.9394	21.5949	11.311	12.0384	33.9247	13.9363	27.2791	40.4521	43.5924	24.1003	9.70694	90.1273	24.6505	47.9502	98.9628	10.9775	7.07544	58.8093	20.062	8.66625	15.3137	37.7902	3.29456	39.5568	28.6546	14.3836	27.3547	16.4273	22.6234	34.8979	31.2629	6.4199	64.3942	9.90379	6.24811	51.3444	26.6111	34.7034	10.094	85.4358	65.7684
164	82.034	3.41808	97.0799	55.4427	68.0897	49.6908	42.5693	32.8907	28.3021	22.9768	12.2739	12.3789	31.2677	14.5004	25.9462	37.9219	41.9281	25.7062	9.01592	82.6529	22.1495	48.8358	92.2089	9.75149	7.34771	58.8677	19.6822	7.99466	15.489	40.4178	2.33113	40.9877	29.0831	13.5272	30.6537	17.6242	20.4442	38.9168	29.2288	6.02091	66.5738	11.4316	7.33818	48.2592	28.0903	36.2212	10.649	80.3754	62.7222
165	82.5342	3.43892	89.3628	59.5101	70.7658	51.0048	47.0361	32.8031	27.7472	20.2616	12.4788	12.9726	33.7788	15.0745	26.9875	40.0628	37.8899	27.0781	8.08185	76.24	18.7143	54.6748	91.4011	9.4692	8.38915	58.1961	18.6701	9.03586	16.8223	38.2087	2.06838	41.0266	29.2972	14.1599	28.6686	18.4711	20.6098	39.7637	28.9566	6.02091	68.3744	10.6629	7.68866	43.4325	26.7183	35.8321	14.1137	79.9083	56.3875
166	83.0344	3.45977	86.784	60.0453	79.3685	48.5431	51.9504	32.4528	27.3193	19.7943	12.0117	12.6126	32.0269	15.4641	27.3572	41.971	39.2523	25.6186	7.14778	68.6693	20.5144	62.2551	82.176	10.6856	8.01911	56.5518	17.7848	9.07509	17.8927	35.2895	1.99026	42.1166	29.9491	14.5977	28.24	15.3764	20.4247	40.046	32.0315	4.16218	71.2841	12.1129	7.39635	37.7976	25.2585	35.9003	14.483	76.8235	57.886
167	83.5346	3.48061	84.0786	57.1067	77.3541	49.7302	51.2296	31.285	28.1657	20.8162	12.6924	11.873	33.2628	13.8486	27.6102	42.4186	38.9117	24.2562	6.74886	63.959	21.439	66.6541	76.5999	10.8125	7.01678	53.8173	20.0035	8.69533	23.0697	34.4132	1.00757	45.0555	27.6621	14.7732	27.6269	13.7026	18.7116	41.9629	33.3453	4.84339	70.6709	11.8598	6.81269	37.8077	24.3827	38.5668	15.4951	73.5437	62.4108
168	84.0348	3.50145	81.6846	56.7173	70.2987	49.6033	50.9476	28.4531	29.2457	20.933	12.741	12.3498	31.6864	16.2132	23.2795	40.3454	41.4414	24.4023	6.43714	58.422	22.1299	62.985	72.4538	12.2039	6.57904	54.3139	22.7382	8.53978	25.7264	33.0704	1.75693	46.9045	29.7932	13.7899	25.8171	13.5372	16.5699	44.318	27.4383	4.91151	69.0067	11.2176	7.32816	33.7983	25.2196	40.1041	19.067	75.6557	66.7998
169	84.535	3.52229	83.7283	52.0367	79.9816	49.5647	42.0438	30.0588	27.1244	22.3149	13.3152	11.8634	29.954	18.9966	23.9125	39.4595	39.0768	24.6258	5.68781	54.0034	30.0322	62.7029	74.1765	11.7852	7.50364	53.8079	23.7794	7.48877	27.9744	35.3182	2.11673	51.926	30.0658	14.3254	25.1746	13.9167	19.1694	41.7488	21.9692	7.16923	74.7584	11.2954	6.39402	28.2903	24.3241	41.3792	22.726	75.1007	71.958
170	85.0352	3.54313	86.0638	45.3507	86.2585	49.4772	35.8928	33.533	27.1636	23.6482	12.7802	11.2288	30.0222	17.5074	24.3311	36.0347	36.4397	28.2949	4.45183	51.5799	33.5547	64.8828	78.5754	11.8339	8.44732	53.4279	27.1174	7.28418	24.6367	38.0723	3.40141	53.1327	25.8814	13.8486	26.0115	14.8509	20.4149	41.3401	20.0522	8.31755	72.6074	11.8696	5.62535	25.7792	24.1003	38.8195	24.2245	76.8627	73.1544
171	85.5354	3.56398	81.889	46.0026	95.9413	50.3435	32.5453	30.1269	26.3558	24.7965	12.2739	11.0166	26.8011	15.1041	27.5905	34.0199	30.4059	32.5865	4.55919	49.6732	34.4306	63.5593	83.2466	11.5325	8.55461	54.0412	29.1122	7.75152	21.9702	36.311	4.38445	49.9797	27.4772	12.4667	26.4498	12.5735	19.2376	43.3934	17.8724	12.3561	68.7344	12.5313	5.15804	23.755	26.6308	36.4644	21.7719	77.6605	71.413
172	86.0356	3.58482	80.2541	48.6306	98.2185	59.4321	28.3124	27.8303	25.5773	23.2491	13.5102	10.4134	25.2733	13.6735	30.0625	30.8381	27.8271	30.0465	6.21371	45.9947	36.7567	62.1579	78.2055	10.0047	8.86599	54.6056	24.2755	6.19428	21.3183	36.7002	4.41353	45.9414	24.9278	13.5272	26.7613	10.5984	20.5805	42.7511	13.8141	13.2514	67.703	13.8256	6.84178	22.4709	27.4285	36.1144	18.2685	74.2836	62.6736
173	86.5358	3.60566	85.947	44.6988	102.306	67.4415	23.0766	28.239	27.1537	19.6484	12.4203	10.4815	22.8209	13.0017	28.0776	29.3293	25.5404	26.154	5.74613	43.6299	37.9245	60.3673	76.3756	10.5984	9.80967	53.5548	21.8231	6.56424	19.9556	33.294	6.54462	42.087	18.8551	12.9435	29.2915	12.3012	20.3662	38.625	10.2718	10.8672	66.9048	14.0008	6.42311	23.8523	25.9788	34.207	17.0914	71.9088	63.005
174	87.036	3.6265	89.3628	42.6943	103.98	71.0517	22.3269	33.241	27.6307	19.9698	13.2081	7.75637	20.8844	12.3107	27.7174	28.6286	26.1241	24.3827	5.78536	41.8686	37.2531	57.166	72.7652	10.9388	10.1406	51.3162	21.0643	7.59563	18.1748	33.489	7.17732	44.2092	20.0035	12.1939	30.167	13.0894	19.5772	37.039	8.86069	11.6652	66.1752	13.7186	5.79081	21.6435	24.9957	34.8784	17.6364	69.8946	60.1338
175	87.5362	3.64734	82.8524	43.7355	111.307	71.4506	22.0449	39.7417	27.1051	18.432	13.8309	7.18225	20.8358	13.5081	25.5182	29.3005	25.3066	22.2319	5.50307	45.4884	39.17	51.395	69.5346	10.2574	11.0266	49.3314	17.8041	5.86357	15.0411	33.2361	9.18194	43.0998	20.1009	12.1162	32.1135	13.8681	18.2148	33.0487	7.50804	8.99876	66.3211	13.8256	4.59393	24.1541	26.3971	36.7567	16.7893	68.9896	56.9126
176	88.0365	3.66819	82.1712	41.02	115.94	70.8964	21.8312	44.0819	27.7279	16.4664	15.2908	7.6982	17.8092	14.0822	24.1364	29.0374	23.4673	21.7551	4.81205	50.5096	38.9755	47.9303	74.7021	9.05101	11.4543	48.484	15.3811	3.4403	13.0073	35.2503	10.8072	44.5105	18.1446	14.5686	33.2814	13.6054	19.0915	27.8325	6.6809	8.32728	64.9001	14.4873	7.03633	27.2584	28.0903	36.7858	16.595	65.4277	53.7985
177	88.5367	3.68903	80.9158	39.4049	118.373	70.9642	22.0746	49.2105	27.3193	17.741	14.123	7.66911	17.0696	13.5953	21.3917	30.5851	21.1807	19.9937	5.03603	56.1054	37.9049	44.0769	84.988	10.7538	10.5006	47.6279	13.201	3.40141	13.2897	37.7515	10.233	48.4226	14.0768	15.7268	32.8333	13.7999	22.8377	25.9547	6.45703	8.07426	61.9027	12.035	7.83457	26.4702	33.4718	38.4791	16.1572	60.5137	53.6135
178	89.0369	3.70987	83.4558	41.6727	119.618	63.3544	26.7455	52.4413	31.7083	18.3252	13.2667	7.64956	16.0087	12.5735	18.4333	34.8179	21.2777	18.7969	5.50307	60.0755	37.5645	40.8457	91.479	11.9507	10.5688	47.9488	12.0624	4.0145	13.387	39.1136	8.89992	49.5709	14.4079	20.4758	31.3931	14.7536	20.5513	25.8574	6.60312	8.01587	61.9222	10.6823	7.94139	24.8646	33.2482	33.9152	17.675	60.2116	57.9053
179	89.5371	3.73071	84.3413	47.453	113.906	55.9582	31.271	56.8984	27.8736	17.6342	12.6831	8.25277	16.4369	12.4762	16.3508	33.7965	22.5916	21.1421	3.95591	64.7858	38.294	38.6079	87.6642	11.0652	10.4911	46.2556	11.031	4.89033	13.4356	35.5231	9.396	52.5784	12.15	21.624	34.5659	13.3522	16.6576	24.8742	8.60774	7.16923	65.3188	9.44641	7.65909	25.7406	31.3309	33.5451	17.8406	54.6748	61.3308
180	90.0373	3.75155	87.2219	52.698	111.366	53.0677	36.5742	59.9541	28.5357	17.8092	14.123	7.50364	15.2109	12.7098	17.5868	32.842	20.5676	21.6966	4.9483	72.3863	36.4353	35.6981	88.0927	14.5881	10.0824	47.0052	9.00678	4.0243	14.3699	36.2038	11.5467	53.0058	13.7072	21.8381	35.2274	13.6735	16.3278	26.4316	7.35249	6.58534	67.1966	8.04507	7.26999	23.035	32.8685	30.7132	20.3998	52.4849	62.3236
181	90.5375	3.7724	84.6333	50.8882	115.161	52.3669	43.9601	67.4863	31.1434	18.7143	14.123	6.37447	13.8877	11.8825	18.7739	36.3454	16.052	23.1663	6.50526	77.3401	34.6157	34.6761	81.7767	15.2986	12.1357	45.0787	8.13094	3.92691	15.9366	38.8801	12.1696	53.5998	13.5902	19.5025	34.7314	14.2377	13.642	26.7234	8.00447	6.01117	67.6248	8.87225	7.23089	22.0131	31.6619	28.8158	22.0054	52.9228	61.7201
182	91.0377	3.79324	79.1155	45.6912	117.808	50.4696	43.756	71.3011	32.1362	18.1692	14.853	7.40637	14.8218	13.0603	18.2584	35.0803	15.1566	23.4581	7.24478	84.9599	34.7034	33.2747	75.6849	13.0312	11.5325	43.5503	7.63451	3.74193	17.4934	38.5687	16.1011	57.0354	14.5442	17.9456	32.8627	14.4808	12.3171	30.0708	10.9144	6.24473	74.6316	10.4098	7.9514	22.0718	32.4306	28.193	23.2125	52.3392	57.9931
183	91.5379	3.81408	78.9598	44.5821	124.863	49.8083	42.5299	79.4366	31.6884	15.2691	12.9067	9.4692	15.9896	12.1357	16.5455	36.2099	13.6579	24.5578	9.00666	101.026	34.6352	35.221	74.5172	14.0526	10.5397	42.5382	7.91688	4.45241	17.737	43.3955	18.9328	55.6138	18.2227	15.5127	33.0282	14.5781	12.7165	30.9273	11.4202	6.14742	76.0135	10.478	7.28954	23.9305	32.8587	27.8521	26.628	51.57	58.9953
184	92.0381	3.83492	74.4736	39.9787	125.963	50.8882	42.7339	87.1246	29.2849	14.4131	10.279	8.77825	17.1474	14.1308	15.2898	35.6548	12.3538	22.9911	9.13309	116.207	34.2752	38.228	72.318	13.284	11.3184	38.9374	9.77576	4.32594	19.255	43.7462	20.3051	55.9743	23.5457	16.291	31.9578	13.8972	17.2615	34.4597	11.8872	6.0793	72.5688	10.4098	6.93906	24.9328	32.6254	28.1635	27.5043	51.2686	59.0052
185	92.5383	3.85576	67.5058	40.3098	119.647	50.7613	37.4596	87.0175	27.5915	16.6319	11.126	7.86366	17.887	14.6368	15.3584	33.8448	13.8432	22.0081	8.59794	126.542	32.8833	39.5808	73.6122	11.8534	9.56648	32.9041	12.8801	3.88802	19.8971	43.0941	12.9869	55.381	26.8739	15.7459	30.6047	12.4471	14.4394	33.7688	14.5246	6.3907	70.5641	9.48534	8.17504	23.4923	33.4329	28.6403	23.0667	51.7743	54.8205
186	93.0385	3.87661	66.2699	41.653	116.027	53.3988	35.7763	85.6162	25.9859	16.3882	11.2911	8.02913	18.4225	16.1255	16.1561	36.9487	15.8378	22.845	7.95542	133.364	31.0441	39.2986	76.7356	12.0094	8.56415	22.3943	15.0014	4.5985	21.0457	41.3813	13.1232	55.7111	27.8275	16.0869	29.8071	12.418	13.9036	32.1632	16.6655	5.17426	72.7047	9.38802	8.90509	23.6678	35.9633	31.1123	20.7112	52.2707	51.5115
187	93.5387	3.89745	68.3913	38.4219	113.147	58.1669	36.5356	82.5215	28.2143	16.0087	10.8047	7.93185	21.1472	18.607	17.0712	39.3621	16.5773	21.0643	7.70256	134.668	30.5091	41.7021	68.3668	10.3547	9.65422	30.228	15.673	4.60831	19.284	41.2157	12.3448	58.3784	26.835	18.2765	29.9334	10.5788	14.3906	28.6017	17.308	4.68768	75.5562	10.7699	7.11406	27.1807	38.3281	31.6769	18.4927	50.1201	51.1322
188	94.039	3.91829	68.3816	40.495	108.602	62.8287	38.501	76.9454	28.1365	15.1332	12.3131	8.20413	20.6508	22.5972	18.6958	42.5448	15.9256	22.2221	7.79956	147.484	28.6017	43.1234	68.4739	11.513	11.4643	29.547	18.1838	3.92691	20.5396	40.8849	12.6562	60.8689	28.8691	20.0475	30.5857	11.9607	15.0531	26.587	17.2593	4.16218	76.8504	9.86487	6.88088	28.699	38.9895	29.7595	16.2444	51.5115	50.6165
189	94.5392	3.93913	64.8101	44.9904	109.809	63.5294	42.5693	71.8266	27.9907	15.8046	11.5639	7.21181	19.0161	21.5658	19.3674	43.2649	15.7599	23.5846	9.70694	156.185	28.008	43.9311	63.1214	12.4957	13.5858	29.5856	20.3829	4.06319	22.1451	37.693	14.1255	57.5508	24.6843	17.9652	27.2088	11.7171	17.1349	28.6017	17.4733	3.44205	71.1382	8.66789	7.72728	25.176	40.3229	27.5893	16.5172	53.867	51.7064
190	95.0394	3.95997	63.6326	46.295	104.379	60.2692	53.731	67.6031	27.66	19.1716	11.846	5.77126	19.4343	20.4758	20.0296	34.6132	14.7288	25.2389	12.471	169.604	27.9885	46.3053	61.8372	14.9577	16.2619	26.5011	16.8214	4.81256	24.1793	36.428	5.57174	58.4461	21.2006	15.3764	24.5811	13.4885	16.3375	30.5772	18.1933	3.65614	63.5378	8.20077	7.49363	23.8718	42.5903	28.0662	16.3322	52.6213	48.6023
191	95.5396	3.98082	62.1826	49.0492	97.041	60.4544	53.3421	60.3628	26.2194	21.7117	11.184	6.53994	17.5465	18.7143	20.8076	37.4555	16.0618	25.784	10.4372	173.847	26.4215	46.3053	58.9174	13.8385	17.9942	26.5106	16.8504	7.74172	23.4882	34.4232	6.7881	54.5831	16.2762	15.1527	25.5443	10.8025	16.8719	32.2801	18.2714	4.11352	60.9199	6.99406	8.39868	21.5754	42.1818	25.682	16.1086	51.8721	54.0613
192	96.0398	4.00166	64.2262	52.0075	93.8783	59.9287	48.7877	65.394	24.2632	21.9645	11.2039	6.58858	15.5318	18.1597	19.9421	34.6723	16.4122	24.7134	8.81156	177.662	24.7087	44.2226	56.494	12.2039	20.9426	23.7564	16.9769	10.7098	21.6489	35.6981	8.02409	50.8072	12.5588	14.6563	25.9244	11.7852	18.6044	32.9028	19.41	5.72896	59.0807	6.34205	8.59324	22.169	39.6808	22.6554	19.1934	53.9641	61.3987
193	96.54	4.0225	60.8105	49.1753	94.2967	60.9116	44.0477	66.0947	21.5483	19.7653	10.8925	5.859	13.7222	14.6659	20.3307	36.589	17.2978	25.2	7.01154	171.055	24.806	45.4882	51.4336	11.698	22.8695	20.4087	17.3661	11.7219	19.8485	34.9003	10.2039	52.8407	14.0768	17.1865	25.4278	13.8195	20.6292	32.4846	17.3858	6.54641	56.4046	6.00144	8.74916	22.5095	27.2631	20.8453	25.5866	56.6111	60.6009
194	97.0402	4.04334	56.441	49.1075	98.8121	62.8287	42.4134	64.5668	23.6117	18.0429	11.8653	5.22623	13.9067	10.5884	19.3674	36.3851	18.7479	22.9228	6.67093	163.074	23.0254	44.2426	58.4696	12.2134	24.2128	19.2508	18.7093	14.3883	18.6419	38.8901	14.5831	53.7461	12.082	19.6289	25.4762	13.8486	22.2532	33.2242	17.7165	7.80178	58.8375	4.9407	6.9877	24.6796	36.5277	18.1597	27.5722	60.9515	58.5867
195	97.5404	4.06418	56.6746	46.295	99.9605	64.2199	42.8513	63.5353	22.3461	20.7385	10.0454	4.42847	14.89	12.048	23.572	30.9642	21.6962	22.6212	7.1674	151.825	26.2365	46.111	65.3499	9.76103	23.2004	21.6352	17.8818	15.8772	17.3769	40.8656	14.6805	59.8957	12.7631	18.6561	26.2745	13.2062	22.5455	30.5868	17.7942	8.99876	59.7135	6.65346	6.88088	24.6114	37.1212	18.8406	28.4093	64.1728	54.3241
196	98.0406	4.08503	59.8665	45.614	99.9605	68.4631	42.5693	65.5984	21.4412	22.3245	9.78261	4.94394	17.2742	13.4594	23.4159	27.5683	26.4162	21.2493	6.11616	144.02	22.1204	43.5612	64.26	9.37192	22.8986	22.3257	14.8651	16.2959	16.7054	38.2766	15.1278	62.271	12.9869	18.2279	27.2572	14.9191	25.1728	30.7909	16.9576	9.82594	63.1387	8.47326	8.1655	21.9354	35.0679	18.617	29.1	64.6978	50.2951
197	98.5408	4.10587	55.6333	41.5166	101.235	72.7741	43.3575	64.5474	20.9255	24.0178	10.0654	6.11173	18.4711	14.5591	22.6276	31.6361	28.2069	19.5754	6.69982	136.595	22.4609	48.8259	67.6562	11.0457	25.0787	23.3773	12.4614	16.8602	18.1457	37.3037	17.4439	67.2138	14.155	19.6389	27.7048	16.5732	24.9196	33.6424	18.2031	11.0035	65.387	8.17158	7.92184	21.5658	32.0123	19.0838	23.3489	65.8855	48.3295
198	99.041	4.12671	53.4534	41.8083	101.848	74.3506	42.9967	63.4088	18.7456	23.1423	10.2497	7.97047	20.2516	15.9018	23.6981	31.8307	30.6882	16.5001	6.84587	129.375	18.977	46.996	71.2181	11.0752	30.0418	24.9924	11.6245	15.8092	21.0068	35.9902	16.0524	69.7643	16.8701	19.7262	28.5809	17.8579	25.2605	34.3625	17.0841	11.8988	68.5494	7.89909	7.30909	22.8695	33.5888	19.8234	20.4291	67.2962	47.4538
199	99.5412	4.14755	49.4538	42.0518	94.5497	78.6907	41.7512	64.0997	20.9547	20.2712	10.7268	8.63234	21.7117	13.4885	24.603	34.5361	33.5203	14.9723	5.65893	125.754	14.5004	44.914	69.3303	9.72241	34.567	26.1795	11.9457	15.5563	24.1887	33.6347	15.8481	70.7662	20.9767	17.6633	28.2596	18.2765	27.2853	35.2289	17.0354	11.3149	72.1696	7.86017	5.46942	23.6287	35.4862	17.6047	17.9378	67.4033	46.9574
200	100.041	4.16839	50.8259	42.6746	87.7182	83.8199	38.9678	64.2749	21.519	18.0038	11.4667	9.57649	23.1909	13.0312	24.9246	32.3368	30.0751	13.2399	5.36683	126.523	14.1404	45.3225	69.846	10.6661	38.9559	26.6564	12.4516	16.8701	24.3543	33.0412	16.072	65.1998	22.7088	15.5223	25.7491	16.0282	27.6736	38.0604	16.0135	10.2736	74.612	7.92829	6.4913	23.4732	32.1289	15.2014	15.4758	67.2769	48.8159
201	100.542	4.18924	51.7601	41.8374	83.6017	79.6839	40.4568	72.0601	22.901	16.7292	11.7875	9.36239	24.5628	16.6414	24.9144	31.2756	29.5595	13.2304	7.49819	127.097	13.5663	48.213	65.8363	10.1506	41.9143	25.8973	12.2474	16.1887	24.3543	29.2071	15.3615	62.2507	24.5578	14.6272	24.1238	15.5223	26.4573	32.0464	15.9259	9.82594	77.6095	8.7944	6.92952	26.597	32.5668	13.7608	15.1258	64.6399	47.6481
202	101.042	4.21008	51.9353	37.8772	77.1108	74.0298	44.3691	73.3934	25.0516	16.9624	12.2739	9.9656	23.7359	16.4469	22.3652	31.2663	26.1241	14.0089	7.24478	121.22	9.91696	49.7987	62.5864	10.1215	42.6248	27.1333	12.8801	16.2472	22.486	29.3236	14.8556	59.9642	22.8548	13.3426	22.6254	17.0601	24.5216	30.2363	16.6364	9.49507	82.9812	8.55111	7.62047	29.2731	35.9535	12.408	15.2522	66.5862	50.5679
203	101.542	4.23092	54.9034	37.9545	72.2645	70.4093	51.3662	74.9309	24.1174	18.0233	12.5274	11.2598	20.4171	14.8604	23.367	32.0931	29.929	12.7631	6.69055	115.283	8.85598	50.2272	64.1628	10.7343	41.7583	27.8538	15.021	16.4223	21.3375	32.3797	14.9916	52.4024	19.3417	14.0917	25.0385	19.9016	22.1558	31.4141	18.8649	9.71889	82.9325	8.5803	8.73963	33.4574	36.664	13.644	15.4951	65.8855	54.1298
204	102.042	4.25176	54.086	39.2393	67.2236	69.7085	60.728	73.9772	24.1953	19.5416	13.2959	11.5521	23.3755	14.2181	22.5693	31.8883	32.0217	13.7461	8.57832	117.21	7.34771	49.643	58.7517	10.822	40.8046	27.6685	15.235	14.5831	22.291	30.8127	14.6805	46.9146	21.4244	13.5467	27.676	22.6554	17.7973	28.5235	17.8139	7.55849	82.3098	8.40513	9.53739	35.9003	37.9483	12.9435	16.5271	63.2093	51.7743
205	102.542	4.2726	52.0326	34.9378	65.54	70.4676	67.3065	73.2668	23.5046	23.1227	13.0038	9.91696	20.573	13.6054	20.2243	38.6031	33.3743	14.8262	9.22029	108.52	6.3554	54.1298	55.6376	11.0361	40.8537	28.3693	16.6949	15.2739	23.9067	28.4286	15.4589	39.83	17.2495	13.2158	28.0064	22.8309	17.4466	28.8253	16.5586	6.15715	81.7456	7.50983	7.2018	38.1577	37.783	11.3084	21.0033	61.7687	48.8552
206	103.043	4.29345	49.5705	38.9958	64.9172	68.4734	68.1438	75.3202	23.446	24.816	12.6924	10.1702	19.8044	11.5616	20.467	38.2434	41.0038	13.6	10.7189	106.32	6.5695	52.962	55.1998	10.092	40.5033	28.9242	15.5269	14.6412	24.004	29.9756	17.0452	48.1205	19.1956	14.4618	28.0162	21.3808	18.9259	28.0662	15.8674	6.11822	79.2055	7.8699	7.49363	38.3331	35.4378	12.8753	22.4725	56.8546	48.5045
207	103.543	4.31429	49.3954	36.2905	65.5887	70.429	61.7107	71.3205	21.2176	24.2614	11.7389	8.25277	18.4029	13.0603	19.4163	38.3018	19.9643	14.4468	12.6754	104.792	6.80268	46.8796	53.137	10.1797	37.2917	30.1208	17.8916	13.6295	24.987	29.0028	14.2033	43.9173	20.0522	13.9554	26.6926	20.8939	16.7355	28.0857	16.6168	5.3105	73.6974	8.04507	8.18458	38.2845	30.8541	15.0063	23.086	58.0125	46.7625
208	104.043	4.33513	50.5632	37.0787	63.3017	69.6794	60.2709	76.1085	19.3491	24.3783	10.7854	9.22601	16.5051	12.8658	18.9102	36.0635	29.9197	14.651	14.8356	102.058	6.2772	50.5386	48.4659	9.04099	38.119	28.8367	20.1009	12.3059	24.6171	29.2656	14.252	47.0695	23.3705	11.9121	25.4082	19.7943	14.79	25.9738	15.089	5.42728	68.6758	7.97695	8.7587	36.9121	26.0177	15.5027	22.2197	59.1703	45.9453
209	104.543	4.35597	51.2444	40.6606	63.039	67.6851	53.5847	73.4809	17.9671	22.5872	9.98752	8.84644	17.8483	12.3694	16.8765	37.1535	23.7791	15.2154	14.9621	99.1187	5.01212	53.7985	46.0817	8.17504	37.9145	28.2913	23.283	12.1405	24.257	27.3872	14.2909	46.2622	22.2516	10.1115	21.7787	19.7943	13.0867	24.271	14.369	4.53198	62.2822	7.67527	9.88787	42.4884	23.2928	15.4541	24.0881	59.3945	42.6463
210	105.044	4.37681	53.2393	39.5215	65.2578	69.6408	47.5125	76.9162	18.6385	20.6703	9.94828	6.61814	17.381	13.4885	17.0807	43.3622	29.0729	18.3394	16.9277	95.3719	5.53761	48.5824	48.7287	9.05101	38.7709	26.5201	22.378	12.7438	23.245	27.9515	16.0622	40.832	25.0833	7.75637	21.2435	22.5486	13.8646	25.2733	14.2033	4.45413	57.8447	7.25681	8.52552	47.1791	20.8989	17.1378	23.8452	59.4331	44.0962
211	105.544	4.39766	58.6014	34.4609	69.2866	69.1347	41.2257	81.9182	18.2785	18.5393	8.45912	5.23624	17.887	14.5686	16.3894	44.3252	27.9148	20.0133	18.5043	88.8714	6.80268	52.9521	46.0232	8.35004	37.4572	26.5492	20.8306	11.8291	23.1964	23.7767	16.7919	45.9609	26.9128	8.24323	21.6812	21.9745	11.6951	25.867	12.919	4.30815	57.2124	7.14977	7.70773	46.0309	19.6727	16.6705	24.7795	59.0731	40.3207
212	106.044	4.4185	59.3702	34.0235	71.5736	66.1764	40.1266	83.4168	18.1813	17.4297	8.22557	6.81269	16.3105	13.9363	14.8034	47.771	29.7154	20.276	18.2711	81.933	9.07008	55.1026	47.1032	8.5446	37.6517	25.761	19.9548	11.3617	23.245	21.2954	14.8069	43.9951	30.8835	11.4057	23.2286	23.2004	11.0717	28.9131	11.8095	5.4954	51.3343	6.24473	8.50597	42.3425	20.9473	17.7897	25.4895	57.8374	40.0771
213	106.544	4.43934	60.8494	35.6678	72.1283	67.2957	39.5135	87.7182	17.2564	17.3715	10.8146	7.18225	15.8728	14.9191	15.1345	45.5031	26.8543	20.7041	20.2172	75.7531	8.91463	55.4041	47.6095	9.16783	38.9464	25.1966	22.1153	10.5153	22.9532	22.9889	12.9967	43.1286	27.0978	15.065	22.8491	23.0059	12.1822	30.7132	11.2549	4.9407	48.6583	4.98936	8.04868	37.3694	26.4069	17.9747	22.8039	54.3142	41.3421
214	107.044	4.46018	61.8615	33.7507	75.0283	65.1445	37.4018	88.3021	18.2006	16.7974	11.846	7.34771	17.1865	14.2863	16.6621	41.9118	22.2123	20.6456	23.487	73.8849	8.43778	55.1419	47.6189	9.44965	39.7832	24.2917	21.2783	9.71726	23.2838	26.9494	10.3013	43.4891	32.2652	16.6319	23.3844	20.9526	11.5587	31.1123	10.8362	4.86285	47.831	5.16453	7.35773	35.2775	30.1145	16.8846	21.4605	52.8063	38.3158
215	107.545	4.48102	63.5158	32.0189	74.4444	65.6703	36.1651	83.9229	16.955	15.9796	9.39335	4.81757	16.4955	14.4618	15.6303	44.1991	23.5355	20.3149	22.6112	71.9975	7.1627	52.1636	47.3367	9.65422	38.2163	25.1485	20.5969	8.59794	23.7024	29.3628	8.59794	43.2065	33.6956	17.9065	25.3303	18.5293	13.4179	33.662	11.6441	6.43936	43.0916	5.87493	7.23089	34.0511	36.3231	16.6805	19.1542	49.5459	40.2328
216	108.045	4.50187	59.8276	30.2477	83.5531	67.3635	37.1286	92.6521	18.5999	17.1474	9.83182	5.30443	17.537	15.9991	15.6697	47.2354	23.3703	22.047	17.6188	72.7078	6.39402	48.3102	47.8331	9.91696	30.7718	24.0583	21.7355	7.55674	23.5564	30.7934	6.84626	41.0461	25.5798	16.4855	27.2088	16.2132	12.6289	34.0997	13.6	6.14742	40.5324	4.89205	6.99771	30.5091	42.1426	18.6366	16.8771	47.541	43.2012
217	108.545	4.52271	60.0125	31.4254	81.8598	69.9135	39.5914	99.3182	18.872	18.442	12.7802	6.94859	17.2156	16.7487	17.2659	50.7878	19.5163	21.0348	16.6945	77.7193	5.73216	55.6376	50.5193	10.9388	34.5766	23.6981	22.7771	6.7881	23.0598	31.2312	7.46915	40.6568	29.9393	17.2351	28.8145	14.374	11.549	35.258	15.3324	5.69977	42.8679	3.87023	7.63001	28.7185	39.2817	19.5902	15.0087	49.4587	46.9381
218	109.045	4.54355	55.4289	31.1621	81.7625	73.679	41.9755	100.525	17.5971	20.7771	9.79258	7.03633	18.0038	15.8728	19.6985	56.383	12.8307	20.8404	16.7626	79.6654	6.64723	55.8133	56.5918	11.2989	31.005	23.9511	22.9617	5.94134	23.3227	35.1824	8.8218	48.6172	33.1996	21.8867	30.2841	14.1404	13.5251	35.1316	14.2814	5.23265	43.8703	4.24003	8.5446	27.648	39.4667	21.8672	14.9601	48.5824	49.0202
219	109.545	4.56439	54.9229	28.8951	81.0813	75.5771	44.7195	97.294	17.5	25.4292	9.5883	5.02214	18.2765	17.887	18.9394	57.1327	12.8116	19.2348	16.1495	80.4537	6.77359	52.6213	58.4117	11.6007	28.2121	24.7299	24.8693	6.64201	22.9532	36.7002	9.04566	47.5366	32.3819	23.4632	29.9726	13.3812	12.3659	35.2775	14.5442	5.13534	43.0725	3.99674	9.09965	24.5432	35.0094	20.9817	15.3494	47.8817	48.4466
220	110.046	4.58523	53.2491	28.0579	83.3487	77.4941	43.756	98.9289	18.2785	27.5602	7.80766	4.73985	14.5395	19.4734	18.628	52.7629	11.5756	17.9403	16.8792	83.4508	6.24811	60.1437	61.6715	11.7562	26.3343	20.3307	26.2023	7.60543	24.1013	31.8541	8.59794	47.3132	31.0877	23.2782	30.7899	13.8385	12.2698	36.338	14.1644	5.62191	40.6396	3.76319	8.90509	22.2568	34.0848	21.9063	17.4613	47.911	48.2616
221	110.546	4.60608	50.6897	28.7484	84.39	81.5718	42.8898	101.936	16.9843	29.8181	7.82696	4.9344	13.5272	18.607	16.9057	46.2529	11.1086	16.6073	20.1104	86.8666	5.50852	55.122	63.6079	12.6417	25.9738	18.803	26.8935	8.49108	23.9259	29.9177	7.9365	43.5958	31.3603	22.354	29.5833	14.3254	13.34	33.1074	13.4249	6.38097	39.9873	4.54171	8.7587	20.9426	39.4667	22.1204	19.8455	47.9988	48.573
222	111.046	4.62692	49.7846	31.6879	80.945	83.4202	43.4153	104.427	15.6994	27.5893	10.6197	5.27487	14.8704	18.1497	17.3724	46.6421	11.556	17.4831	18.9812	93.523	5.29442	56.2897	61.0194	13.1576	25.8474	19.2311	26.7085	9.00678	24.033	29.4213	10.5931	40.0247	33.4038	22.2758	30.0603	13.654	12.473	37.574	11.9359	6.01117	35.5207	4.47359	9.69332	20.0766	40.6344	23.045	20.9934	46.5781	46.9674
223	111.546	4.64776	45.9309	29.9261	81.4705	82.9441	44.4278	100.632	15.0479	26.042	10.2304	6.45268	14.9286	18.1301	16.0008	47.0898	14.7773	17.3272	18.2122	98.0099	6.10219	54.8398	67.569	13.5467	24.4851	18.7542	24.2464	9.81465	23.0018	25.1781	9.67837	35.7615	28.6645	17.6729	29.3105	12.6517	13.2523	39.53	12.7536	6.29339	34.1193	5.65111	10.0533	19.2789	35.9147	24.7769	20.9448	45.7411	44.6997
224	112.046	4.6686	46.69	31.4734	85.7719	75.9854	47.8042	103.036	18.3856	25.3806	8.79981	6.17038	14.1113	18.0329	17.8012	44.6172	16.5485	18.9525	20.4019	98.0975	5.35307	50.8401	67.9582	13.5858	22.8209	17.7034	24.1297	9.78522	23.1575	23.7182	8.22833	48.0427	22.2029	16.301	31.0038	11.5225	14.9069	44.1917	12.7049	6.95513	30.9954	5.99171	10.2188	17.5756	34.5522	26.6261	23.6503	48.028	44.0769
225	112.547	4.68944	48.7336	28.311	85.5286	76.4331	47.2401	98.9776	20.3905	22.2758	8.33269	6.32583	14.9968	18.4611	16.5841	40.5595	18.0667	20.5486	20.8303	93.2602	6.46221	53.0199	67.374	15.1718	29.3603	16.1758	22.4267	9.9702	22.486	25.5088	5.79525	47.6737	18.7286	16.9333	32.0553	11.5616	11.8997	47.0232	12.4422	7.60715	29.1954	6.19607	6.89042	17.556	36.2552	23.9987	25.6452	48.0573	40.7392
226	113.047	4.71029	49.0742	27.3186	88.0783	75.0324	47.1911	98.7732	19.6699	24.5242	8.75123	6.89042	14.0526	18.6461	17.8106	41.0461	17.5991	20.4901	15.5653	92.8223	6.66678	55.6869	67.5005	14.4713	31.1218	15.8155	22.6989	11.4104	23.7314	22.0154	6.75867	54.028	19.624	18.4029	30.0989	11.5034	12.9016	48.376	12.6951	7.80178	30.5577	6.17661	6.24811	17.5074	35.5836	24.3196	23.6989	47.4632	40.3207
227	113.547	4.73113	48.9477	27.1822	90.2581	73.7381	48.5346	93.742	21.704	25.4969	9.30616	6.034	14.2863	16.9237	16.808	39.6448	17.5899	21.0348	15.4291	86.4094	6.7445	58.7424	65.0385	13.0989	30.2559	16.8765	22.3682	11.498	23.1477	25.6938	6.49592	57.2199	17.2786	16.9137	31.1209	13.5081	13.0867	50.8284	11.7706	8.0548	30.5672	6.34205	7.0268	16.3105	35.7784	26.6261	24.7209	49.0981	42.8605
228	114.047	4.75197	50.5048	25.8776	89.8494	75.6354	46.2373	86.8229	21.529	23.2591	9.76331	5.24578	15.7459	17.7315	16.2924	37.3777	18.767	21.395	17.288	85.4074	8.81735	62.3429	64.075	14.3154	30.5381	15.8739	19.9257	11.3228	24.3056	28.2536	7.00216	59.8864	18.0181	17.6438	30.6636	14.4031	12.9698	48.0255	11.8291	7.27628	30.9664	6.70211	7.4159	15.5514	31.3214	23.1809	24.2146	52.2321	42.4127
229	114.547	4.77281	49.3564	24.2333	90.2289	74.3703	45.4105	84.4192	24.4874	21.439	9.52041	5.8199	17.3519	19.4052	17.8784	39.0515	18.2417	20.4218	20.9371	82.3516	11.338	69.9139	66.3813	14.7922	29.7595	14.4432	19.6531	12.4909	25.6291	29.2656	7.31361	63.6622	19.4002	16.6219	30.3809	14.9677	10.9353	45.3595	13.3082	7.60715	32.8251	7.04272	9.14828	16.0282	30.2606	22.7041	22.726	53.1663	40.34
230	115.048	4.79365	44.7048	26.472	87.7279	70.5165	44.2036	82.6383	27.6208	21.0499	9.41328	6.66678	15.055	17.9356	21.8883	39.9857	17.9692	20.0325	24.7518	80.2303	11.5034	70.7802	66.3813	13.9363	28.9421	13.6841	19.8479	11.5663	24.257	27.6307	8.27703	59.0199	16.4416	15.1718	30.0989	15.3859	11.1496	39.7246	13.0941	7.94775	35.6862	8.28836	9.24556	16.3396	27.5553	22.6945	23.5046	50.6358	38.9772
231	115.548	4.8145	39.3719	28.4079	85.5772	66.5752	41.8003	84.0591	28.4965	19.6775	10.8532	6.79314	13.4203	18.1793	22.2966	42.73	19.7697	20.4512	24.1099	74.3035	14.3349	67.6076	64.5714	12.7199	30.314	12.8375	19.3126	9.94112	25.3663	28.0393	12.7536	58.1059	15.1765	14.5199	28.5907	14.8313	11.4613	38.109	13.6778	7.93802	34.8879	9.10581	7.77592	14.5781	25.9494	20.9721	22.2683	47.7166	38.9287
232	116.048	4.83534	37.6299	28.6515	86.9591	66.9355	39.2989	81.0423	29.6842	18.5488	9.83182	6.63721	13.0117	20.7285	23.2898	44.5012	21.56	20.1009	24.6935	77.0379	16.3692	66.5569	58.8296	9.66375	31.9491	12.6531	19.1665	9.04566	26.1837	28.8764	13.0941	63.1857	13.4932	13.9654	26.0507	14.9191	10.0112	33.7883	15.4589	7.81151	35.803	9.25178	9.13827	17.0406	25.2974	19.9212	21.3147	47.366	37.9652
233	116.548	4.85618	34.7494	30.6269	85.0226	69.3294	40.7099	81.996	26.3266	20.4171	10.3569	9.08009	13.3326	21.0403	24.8663	42.9146	20.6357	19.0012	26.3093	80.4248	17.2547	62.3043	58.781	8.68097	30.2559	11.0569	19.1178	9.93131	27.3224	23.9231	14.8069	67.8468	14.7971	11.8634	26.1187	13.4785	11.4321	33.0197	13.6196	7.69473	37.8077	7.69473	9.83923	18.0138	26.2415	19.4148	20.9255	47.5609	36.7002
234	117.049	4.87702	34.2628	33.8965	83.8256	70.0199	41.5279	83.6115	24.6038	20.6121	10.1818	11.4739	14.3449	20.7094	29.1773	44.3447	18.6117	18.9721	26.9807	77.9138	18.9575	62.2165	56.0468	7.92184	31.3555	11.6015	18.6119	12.5686	26.7192	18.4635	15.0599	76.3615	13.4932	10.7734	27.7925	13.0503	12.6191	29.1562	15.4295	7.55849	40.2792	8.63869	9.07008	21.2249	27.7207	19.2493	21.0812	44.534	37.4787
235	117.549	4.89786	35.9074	33.9651	74.2595	67.6851	42.6858	83.4752	28.6328	15.5514	10.0747	9.94605	13.5372	20.5926	28.7004	49.7562	19.1076	19.9744	26.0271	77.009	23.4341	53.3999	53.9156	8.9728	30.2168	12.3803	17.7652	14.8069	26.982	21.2468	16.0426	88.2441	12.5977	10.7829	28.6391	13.3231	12.8529	26.2952	15.8092	7.35413	40.756	9.81621	9.56648	25.2051	24.7621	18.1888	21.694	45.1475	37.3037
236	118.049	4.91871	39.5957	31.289	75.8944	64.7851	44.9726	82.9984	30.8713	13.2258	8.02128	9.80967	11.9216	19.7362	29.4397	54.4367	17.8526	21.4728	25.1219	74.5374	26.3925	51.3072	58.6739	7.92184	28.7571	13.5966	16.8406	15.4782	27.7508	20.7405	10.3013	92.8763	12.2961	8.47688	29.6415	11.8825	13.2718	26.3634	15.3713	6.77023	38.109	9.89406	10.277	27.5698	24.0614	18.8602	20.8183	44.5926	40.8849
237	118.549	4.93955	41.4544	26.8606	75.3202	68.2392	46.578	78.6581	29.9563	13.9749	8.15768	10.277	10.8315	19.4634	30.7435	52.6656	17.2395	22.6989	26.2799	71.4518	26.6261	49.0787	60.0559	10.5593	28.3289	14.0057	16.5975	16.3638	28.6459	20.4291	12.364	89.1978	11.2353	7.9514	30.6243	13.3326	16.1914	28.5335	15.6922	6.36151	36.6108	8.73601	10.1406	30.2754	23.614	19.5511	18.8428	45.6725	44.3491
238	119.049	4.96039	40.9192	24.0292	68.5179	69.7771	47.6684	70.7172	31.6205	13.8385	9.08194	8.72008	15.795	17.8674	28.6129	53.0836	15.8089	22.2806	24.9856	66.9465	25.9933	47.2981	66.5569	11.0752	27.7257	14.1902	15.8674	17.6485	28.9864	20.8576	10.4081	86.2978	12.7729	8.7978	28.7562	12.8071	14.3906	28.6889	15.3906	6.91621	38.0413	7.77258	9.37192	32.5523	24.4117	21.439	19.232	49.1566	44.6219
239	119.55	4.98123	42.7487	24.9435	61.7155	68.2589	50.7146	65.9293	34.0725	15.3764	9.73403	8.43778	16.1551	17.8674	28.3307	51.7407	16.1495	21.1322	22.8254	59.6867	23.9205	47.2981	69.2817	11.7366	25.3997	17.0129	10.846	20.2175	32.1495	23.9617	11.43	85.636	11.4689	8.96327	26.1868	11.7171	13.301	28.0175	16.0818	6.47829	40.065	7.19842	7.43545	33.5356	27.6912	23.5605	21.4318	49.4487	43.8533
240	120.05	5.00207	46.1937	23.2015	57.4726	64.4832	50.4124	64.5571	33.8782	17.6829	8.28411	9.02144	14.5881	19.0939	28.3204	51.6535	17.658	21.113	23.633	61.3017	22.1786	46.461	66.839	11.357	27.7939	17.1485	10.5542	20.3538	35.8668	23.621	11.031	77.4125	8.929	9.5083	28.6293	12.9435	12.4633	31.3168	13.5223	7.8407	40.756	8.10346	6.54995	34.7811	31.8077	24.0664	22.1811	52.777	41.9456
241	120.55	5.02292	46.6316	22.0924	55.9155	65.3101	47.0939	65.5984	27.5529	20.3685	8.4012	8.13594	14.9191	19.9112	29.6439	49.6682	18.9425	18.8939	26.0172	64.1534	23.8137	54.1491	63.7735	12.418	24.4269	19.1538	11.3523	18.9525	36.3826	22.4532	11.2353	71.6421	10.2428	7.63001	28.7464	12.3789	9.9528	33.5842	11.4202	7.63634	42.1284	8.17158	7.35773	31.6959	31.5355	23.9887	24.0688	56.7182	41.362
242	121.05	5.04376	43.6538	23.3189	49.8041	69.3294	42.8898	61.6571	29.6256	19.8044	7.92412	9.23555	10.822	20.5048	31.3954	45.2984	17.21	18.2907	22.251	60.9321	25.4388	52.3878	61.0387	12.5348	24.6114	21.9072	11.1575	16.1207	33.4047	20.4291	14.5246	76.8387	11.5954	7.22135	26.7705	12.8362	10.9074	36.3576	13.5902	6.9454	43.9776	9.18366	7.75637	30.6354	30.4161	21.9549	25.9666	56.4847	40.4957
243	121.55	5.0646	42.0383	23.5814	47.9746	71.6942	40.0486	61.19	33.7904	17.6047	6.87343	10.7443	10.6275	20.748	33.7602	41.2991	18.1932	18.7773	23.7981	60.2709	25.3319	53.9056	61.5058	15.6486	27.1416	22.131	11.5369	15.887	31.9839	20.5555	14.3883	67.5354	13.8435	9.13827	26.0311	11.0652	11.4418	44.5126	14.3592	7.22762	45.3204	10.8575	8.93418	28.0276	28.6354	19.2593	26.0251	54.2949	40.0578
244	122.051	5.08544	35.7226	20.7398	48.5098	75.8207	36.7686	61.0343	32.9926	14.4618	6.0457	10.2965	11.688	22.3831	31.4254	38.9347	19.7207	17.0547	22.6891	58.7723	26.8984	54.4412	65.9634	17.5856	26.4802	24.9246	10.4372	15.3615	30.2125	20.4484	14.4468	63.9051	15.955	6.33585	28.9898	9.60558	11.6659	52.9108	15.4102	7.92829	48.3665	10.6726	9.14828	25.4678	23.9738	17.6924	22.8332	48.5923	37.508
245	122.551	5.10628	35.6739	18.9394	44.2863	78.779	32.1363	57.8618	36.9045	12.5835	8.08979	9.53739	10.7634	19.8234	29.2356	36.1998	19.8471	16.1788	22.6308	57.8089	27.6575	55.8133	66.6927	18.1111	23.22	25.0507	11.2647	14.6707	30.3004	18.9113	19.7018	63.3017	17.5707	6.11173	28.98	10.1892	9.54367	58.4579	12.6075	7.35413	51.2762	11.49	8.29187	24.0082	21.9401	16.6901	19.1448	45.3811	36.6909
246	123.051	5.12713	35.5182	17.4796	43.3423	78.1949	32.3509	53.8427	36.0581	11.2111	8.55691	9.72241	11.8339	20.7871	27.2114	33.5427	22.6989	15.488	22.0951	59.3171	26.042	47.5317	69.2817	17.0987	25.507	24.253	11.3523	13.1428	31.254	19.6213	16.0426	65.8514	18.9913	6.06309	28.1039	11.1429	7.41311	60.0635	14.3105	8.0256	56.0737	11.928	8.04868	24.9424	19.9548	20.6412	17.8014	42.5585	35.951
247	123.551	5.14797	34.5645	18.628	44.6658	75.7521	32.6329	51.6044	35.7074	10.2865	7.99201	7.31863	12.6417	23.1518	26.5106	30.8576	26.7181	13.9406	25.7644	57.7502	26.7429	46.4903	69.2525	17.4392	26.5675	25.3132	10.6999	11.9359	29.5316	18.4049	16.6557	67.73	11.7804	5.41124	27.9096	10.3843	9.30153	55.2855	14.252	8.2105	58.0202	11.0035	7.47456	25.692	18.0766	18.8116	19.1834	41.1085	34.6667
248	124.051	5.16881	35.2165	19.6205	50.2615	75.4313	34.8619	48.8991	38.043	11.8634	8.01194	6.12174	13.5663	23.755	27.3572	30.7307	27.681	12.9771	26.3578	57.1275	25.8961	48.0181	67.1212	17.0696	25.8279	27.3666	10.262	9.88262	29.9109	17.5	17.7652	64.9662	14.0187	5.62535	28.3767	11.1239	11.3931	54.935	16.4321	8.28836	56.5215	10.7212	6.12174	28.6112	17.8916	17.9942	19.7384	38.5394	32.2819
249	124.552	5.18965	36.9585	19.2311	49.1813	77.3869	35.1535	49.7846	35.6881	14.1013	6.49351	6.54995	15.7268	26.7329	26.6178	28.4052	27.438	15.1278	28.275	59.1804	23.8037	48.758	68.3668	18.3347	29.9249	27.2602	9.66856	10.6222	33.833	15.6801	16.7825	61.7937	15.6632	5.1485	26.5467	13.1671	8.42481	56.5506	15.5854	7.90883	60.0635	10.4682	6.05356	28.3971	17.9113	19.6775	17.8506	38.5008	30.7448
250	125.052	5.21049	40.6564	19.786	49.5413	77.1442	36.6232	45.0746	35.3088	16.0087	6.12355	5.72262	19.7071	33.9247	24.6905	29.1837	27.3213	16.8504	26.9126	64.3777	22.6263	47.9303	71.1595	19.0838	30.5281	27.3572	12.082	12.0431	38.0854	16.2836	18.3492	61.0736	13.3667	4.67166	24.7467	12.8753	10.8587	55.2564	17.1034	8.20077	64.8124	11.4803	5.6058	28.1248	19.2348	23.2004	18.162	37.703	31.3969
251	125.552	5.23134	43.3423	22.589	53.5507	69.6116	36.8562	45.7363	33.1875	19.1425	5.91927	4.83712	19.0161	34.3725	24.0292	31.8112	28.5573	15.7118	27.9246	69.5933	24.0082	47.5217	72.2302	18.7629	30.7618	27.8829	13.2206	9.61006	41.2481	15.9236	19.3904	62.8743	14.4079	6.39402	24.4548	10.9679	10.6542	50.8284	17.2008	7.82124	61.6108	10.4293	5.1876	24.5823	22.3097	25.1565	18.0157	37.0602	29.0414
252	126.052	5.25218	42.0481	22.0436	54.4752	65.0279	39.2604	48.7239	35.2403	19.8916	5.84142	4.01981	18.9088	35.7734	23.114	33.4166	27.6718	13.7948	28.6058	73.1746	22.0036	49.9937	71.228	18.7143	32.5333	29.2648	13.7461	8.2963	44.0315	15.5829	18.7773	51.6924	14.2716	6.62768	26.3621	9.22601	11.0327	47.14	17.6485	7.3444	57.4165	10.2249	4.9735	24.8742	23.4777	29.0199	18.5606	37.683	30.112
253	126.552	5.27302	41.396	22.4132	56.587	62.0018	40.9341	54.485	35.7367	22.4804	4.78076	3.71797	19.9889	38.1577	25.0413	36.4528	26.3578	13.6487	26.1633	75.7531	24.5728	51.5993	72.9115	20.5926	29.5554	32.5636	13.6	10.8268	41.7055	15.875	12.7049	45.2501	12.7438	6.76406	25.1746	7.57183	12.3088	41.8656	16.1498	7.67527	52.6285	11.8209	5.859	23.9305	26.4458	31.3168	17.2278	38.9772	28.8471
254	127.053	5.29386	40.7051	21.5769	60.5283	57.4472	41.5953	57.3558	35.6396	23.94	6.73703	3.26067	13.4885	34.1679	28.8462	35.5863	25.0341	13.0258	23.0488	74.216	27.1807	52.8157	72.8823	21.2153	29.5258	35.1719	12.9869	9.08455	39.6815	13.9287	14.5053	45.4743	12.8216	6.21902	26.1966	8.29187	8.33714	38.09	16.1788	7.80178	51.3634	12.8233	5.39169	23.7064	27.5066	31.92	15.8551	37.6251	28.545
255	127.553	5.3147	38.0776	20.5159	66.4742	55.3355	44.0582	74.094	38.3837	25.4779	6.28922	3.46476	17.1474	35.3648	29.6833	34.6038	24.4603	13.6098	27.1459	73.5249	27.0929	52.7963	68.766	20.5635	29.4481	38.1886	14.7775	10.5542	40.4793	13.8116	13.9798	46.1742	11.4006	7.54227	27.7729	8.84644	9.03851	37.1458	18.0377	8.20077	51.1398	12.7259	5.34306	20.6703	30.358	35.5107	16.235	36.6516	27.0951
256	128.053	5.33555	36.2189	21.4792	70.8534	53.5154	47.8436	90.0343	39.7757	27.3657	5.74426	3.56204	20.8262	33.1365	27.3186	32.7743	21.1125	16.3736	27.7006	72.6684	25.9061	51.6093	66.1969	21.6726	29.5454	38.8405	16.7825	12.7242	41.4525	13.4709	14.8749	49.0937	12.5588	8.74916	28.5515	8.46687	8.7755	35.8416	15.5076	7.3152	53.349	13.592	6.76406	22.8113	28.4602	38.7323	17.3542	37.2159	29.0321
257	128.553	5.35639	35.3041	22.8421	74.7363	49.0973	55.8715	103.143	40.875	27.3752	6.97993	4.44802	19.7848	32.4846	30.15	32.3656	21.3169	17.0841	29.6178	71.1409	25.8088	51.2293	65.5934	19.6875	29.0976	41.8666	16.5292	13.97	41.4623	15.6215	15.5658	49.7173	12.2765	9.09965	28.221	8.51551	8.63912	34.6056	18.1253	7.82124	53.709	13.5142	9.55694	26.0129	29.1413	34.927	17.14	38.8994	32.039
258	129.054	5.37723	36.5205	25.0894	78.8819	43.4628	59.0639	109.614	41.8777	24.9815	8.6441	5.07078	20.3785	32.8447	28.1943	31.5092	23.3311	14.6318	27.1459	70.1284	24.446	50.5772	59.628	18.257	26.7625	42.6943	15.3128	13.853	39.4673	16.8672	15.5076	47.9555	10.7875	9.88787	26.7122	5.6449	10.7711	34.7616	21.5022	7.06218	49.456	13.4266	11.2598	25.5947	26.8059	32.5719	19.2127	37.9751	28.4672
259	129.554	5.39807	30.594	22.3455	80.2054	39.6871	61.4191	117.925	43.7555	25.2442	7.23342	4.39938	18.3638	30.1977	24.8174	31.3044	21.9589	13.4637	26.0461	68.7761	22.6168	48.7866	59.9002	18.7534	27.998	43.492	17.2982	12.5199	37.852	18.2006	14.9138	46.5736	9.15287	12.5544	28.503	7.04635	9.40868	34.7907	21.0741	6.66319	49.3297	11.6068	12.1648	28.3194	25.2098	31.1123	17.8506	36.0581	29.0514
260	130.054	5.41891	28.6769	20.7012	89.9564	37.1473	60.7867	125.428	40.2721	21.4585	5.72495	4.51573	18.1206	28.4558	25.236	28.6481	19.9643	13.8239	26.4358	68.3382	21.7504	45.1083	62.9072	18.4611	26.6943	44.7863	19.8963	14.2033	41.5988	18.337	15.4102	49.9213	9.19175	11.9507	30.8095	6.89042	8.05603	33.4283	21.794	7.63634	49.9138	11.6944	13.6054	29.4772	24.8885	27.6575	17.6457	35.9609	29.4213
261	130.554	5.43976	30.4772	18.6572	88.5551	35.5125	60.8839	131.695	39.0551	17.5465	5.20926	6.40404	18.3543	26.6747	23.2992	29.5333	18.6602	14.3494	29.4816	73.4662	19.7848	41.5271	63.9878	18.617	20.8453	44.7571	15.702	13.6487	41.9294	18.7942	10.9238	48.7636	10.9823	13.5176	32.5513	6.29675	8.28843	33.4574	21.9012	7.81151	48.4442	14.0008	11.9803	28.2417	22.5434	26.6356	17.9864	36.6909	28.7007
262	131.054	5.4606	32.5598	19.5235	91.0658	37.77	61.5645	134.877	36.6417	15.9896	5.68571	6.25812	17.4392	25.7501	23.4451	28.385	18.8547	14.836	28.1094	73.7973	20.0766	41.3907	58.4503	17.1278	22.1399	45.6234	15.9844	13.2108	39.4088	19.2713	8.18944	48.6857	13.8628	15.3668	32.425	6.62768	8.1618	33.331	22.1734	7.32493	48.0842	13.5045	13.5372	26.587	19.011	25.0106	18.4734	37.0702	29.3528
263	131.555	5.48144	32.8615	19.7474	92.8467	45.1268	53.8869	130.615	33.4404	15.1623	6.70776	6.58858	19.3466	25.0687	24.4864	27.5091	24.6744	14.6023	27.8952	73.4373	20.5926	40.0093	56.7182	17.8288	21.6435	47.8424	14.5634	12.0529	40.1196	20.0205	7.07012	45.2797	13.6487	15.3859	31.5881	7.70773	7.93914	36.3576	22.0666	5.28131	51.1398	12.035	11.5225	26.3634	14.3785	23.9791	19.4363	38.3544	30.0342
264	132.055	5.50228	32.8907	19.611	92.4964	48.056	47.7069	128.941	31.2119	14.4031	7.94343	6.9877	17.1278	21.5849	25.586	24.2783	35.7002	14.1353	26.1535	74.4498	19.853	38.6272	56.8833	19.2302	24.3291	44.4655	14.4857	10.9144	42.6884	22.5311	7.28418	40.744	15.3615	14.6563	31.4808	8.48642	8.22024	37.8758	23.0689	5.60245	56.6574	11.4414	10.8416	26.8497	13.4637	22.4899	18.5021	37.6444	29.09
265	132.555	5.52312	30.74	20.5159	95.2115	52.8541	43.0265	127.287	30.1021	14.8118	9.10187	7.01678	15.4832	20.5244	24.4769	22.8777	38.6681	15.9259	29.6178	72.5028	19.2689	36.8852	54.8498	19.3566	22.2859	41.9352	14.4468	11.1477	43.5742	24.1074	7.86819	37.1924	16.1498	14.1308	33.1643	9.18691	7.65664	39.5882	20.5777	6.11822	59.5671	9.06688	9.70286	25.9933	14.4177	20.9426	18.3663	37.8387	30.2291
266	133.055	5.54397	28.5407	19.6205	90.8226	52.0556	41.9947	120.903	28.5942	14.6272	9.49114	8.22368	15.6196	19.6289	28.1943	22.0501	37.2087	17.2982	30.0653	64.3479	19.0838	36.9923	55.7062	17.4392	20.5144	39.4537	13.1915	12.0529	46.4839	22.7939	7.46915	34.3017	14.768	11.6007	33.7192	8.78827	5.83642	40.8437	18.6021	5.21319	63.2459	8.89171	10.5788	26.2175	14.1938	27.1807	16.8771	37.8095	31.8055
267	133.555	5.56481	31.1195	17.8012	89.7229	53.6518	37.5568	124.036	31.4748	15.8627	9.62691	13.2644	17.3419	17.6342	21.0606	19.7729	35.4081	18.0962	31.5154	63.5693	17.3228	34.6667	54.6648	17.8674	20.6217	39.7162	13.8337	13.6	50.0749	20.3319	6.7296	33.7373	15.8285	10.4033	33.7094	9.20646	7.43259	41.2624	20.1201	5.72896	60.9785	9.52426	11.9507	27.9789	13.2108	26.6747	16.8479	39.4836	29.4406
268	134.056	5.58565	32.8615	18.7936	88.8762	56.4154	40.9341	124.357	30.2385	15.1041	10.4447	16.5151	15.3568	16.2423	26.6659	19.7146	34.6201	17.308	29.6958	59.4047	17.2933	33.849	55.1805	18.2179	21.8381	41.4583	13.3762	13.2497	51.3886	20.4098	5.15309	35.489	13.2886	10.9875	31.9382	10.637	7.7638	41.1942	18.9815	4.92124	62.8564	9.44641	11.1529	27.7352	13.6683	23.2491	17.2957	38.6465	29.6157
269	134.556	5.60649	31.6548	19.2019	87.6209	54.1381	37.7907	124.309	29.0414	17.0792	11.126	19.7166	16.661	14.3545	22.8901	20.5616	33.1214	17.7361	29.7056	61.9831	18.0138	33.6347	55.0441	17.7701	20.6412	41.5946	13.5321	12.3448	51.9918	21.9861	6.36945	35.8401	15.303	10.4033	31.3643	9.32329	6.31374	43.7439	21.8427	5.14507	58.7111	9.74809	11.7171	28.0466	15.3128	22.3345	15.7972	37.9459	31.1634
270	135.056	5.62734	32.4917	19.3186	84.935	48.8253	36.9928	116.845	27.6208	19.3761	10.7754	22.9282	14.3645	15.3668	25.0799	22.2159	31.0969	19.5168	26.8151	61.808	20.5048	34.6468	55.5598	15.8627	19.6971	43.0151	14.4272	12.4033	50.5127	22.3561	6.51554	37.338	16.354	9.13827	32.1914	8.14595	9.44765	44.0453	23.0398	5.53433	53.8936	8.26889	10.6565	29.059	13.9406	21.799	14.7459	40.2814	33.9168
271	135.556	5.64818	33.8638	18.472	80.6336	45.4965	37.2161	121.691	25.6159	20.0671	11.6803	23.6482	18.3738	15.3373	25.7129	25.1253	29.0729	20.2273	24.8298	58.986	21.799	34.1411	58.236	13.7804	20.9135	42.8306	15.235	12.0722	47.5641	25.558	6.89495	35.8783	16.0135	7.8732	28.1818	8.52552	10.284	45.4758	23.3316	5.46621	52.7749	6.99406	8.74916	27.6284	13.9892	21.2735	12.7024	41.0114	32.0291
272	136.056	5.66902	34.7591	17.772	77.7726	42.5776	41.2354	114.898	28.3115	20.0571	11.5931	22.0617	18.0915	15.25	24.9435	26.7991	28.7225	19.5946	23.8079	57.1275	21.4781	34.7346	60.903	13.9067	22.675	41.2541	15.5076	12.9481	44.1578	25.0031	6.17501	35.0904	13.0356	7.72728	24.7853	8.38915	9.42816	46.0499	24.6843	5.50513	48.9601	6.38097	8.09732	26.2561	15.7994	22.1008	11.0482	40.6121	31.7083
273	136.557	5.68986	33.64	18.4136	71.3887	45.7495	44.9139	102.53	25.1687	19.1911	11.2817	19.5707	18.9479	14.88	24.4375	26.9937	30.2407	19.478	23.5747	57.6039	21.3613	34.6275	56.2511	15.785	21.5363	42.714	16.1596	13.6683	37.7837	23.0374	9.51301	33.2803	13.785	5.96582	25.2236	9.00237	8.11448	54.2245	26.7863	6.40044	48.201	5.91386	7.06542	24.8551	16.4805	21.4976	11.7974	38.9579	31.1827
274	137.057	5.7107	34.1363	18.2678	68.3135	47.3363	46.1304	99.4155	25.188	19.5416	10.8532	16.8651	18.4515	13.9167	24.5352	32.4045	33.1699	19.3417	23.633	62.8686	22.4413	37.7123	52.9327	16.5442	21.4876	43.1026	17.0841	16.3736	36.8008	20.8769	11.4399	29.8159	14.6412	6.39402	30.0505	7.82456	7.73457	59.3339	28.3726	5.6803	47.0136	6.03064	6.51085	24.9619	16.3053	19.4052	12.0503	37.9944	32.6426
275	137.557	5.73155	38.8366	20.8273	65.7541	46.7522	43.5327	91.3383	24.3802	22.4609	10.3375	15.9114	15.5614	15.5418	25.664	36.7938	36.7411	18.2031	24.2265	63.3748	20.6798	39.4251	51.755	18.0429	21.7213	43.4139	16.9965	15.8383	34.1735	21.0519	12.8412	31.5286	13.4445	5.61581	32.6585	9.05101	9.19437	55.5382	26.0566	6.20581	47.5682	5.78735	8.50597	23.5705	14.8458	18.4806	11.5639	36.3695	34.6954
276	138.057	5.75239	40.5494	23.9606	64.2749	45.3018	40.6127	90.8323	25.7037	22.6845	10.1719	10.2965	15.25	16.2328	27.1239	37.3092	37.267	18.9815	22.9714	65.0976	22.4122	44.719	55.0541	20.8162	22.9182	42.4412	15.4102	17.2106	31.7894	20.8183	17.4926	35.5668	12.5392	5.45988	31.3251	11.2793	9.31127	48.9697	28.071	7.58768	50.9939	6.37124	9.87786	21.5849	14.0281	18.3834	10.5811	35.5617	36.311
277	138.557	5.77323	41.7172	27.9019	62.8346	42.7234	38.1997	89.9272	26.4144	21.8772	8.21623	9.34284	14.9772	16.4178	27.4352	38.4964	41.5777	19.0789	24.7328	63.6183	24.3973	50.7429	55.0833	18.8406	22.7141	39.784	12.6173	18.6021	30.1251	22.2975	18.8747	32.4434	13.4736	7.15316	31.257	11.0557	7.78328	41.0383	27.5066	6.46856	48.911	7.32493	9.39147	18.0624	15.5563	17.6533	12.1574	34.501	37.0309
278	139.058	5.79407	41.8826	30.5882	59.7984	44.0272	36.1757	85.2366	26.4629	19.5025	8.57621	11.0361	15.2791	17.1474	27.6197	38.7401	43.7287	19.4002	23.633	59.7156	25.6238	54.1784	58.4895	23.3368	20.8553	37.5462	11.6634	17.1328	24.0526	22.4632	19.4583	30.9354	11.4591	5.67399	30.4398	11.7075	4.77601	34.2165	27.9249	6.61453	49.427	6.7605	8.13594	19.308	19.5946	16.3692	14.0938	35.1918	37.1966
279	139.558	5.81491	42.9531	32.2719	60.8786	48.2317	33.528	74.8726	23.2417	20.0962	10.1526	11.0557	16.5833	17.8483	26.2867	36.54	43.5924	20.3734	22.5529	62.5384	24.096	53.7499	62.0801	24.8646	21.9354	35.8238	10.9336	16.8602	32.7429	20.8669	23.429	30.2931	10.7781	4.33119	33.5144	10.2479	6.83838	32.8737	26.9713	7.08164	53.1735	6.40044	8.5837	18.7534	25.2	16.0187	15.3979	33.6054	36.5738
280	140.058	5.83576	41.5712	34.7431	59.6816	44.173	35.9129	63.1363	16.77	21.439	9.95825	12.3012	18.3347	18.432	28.1257	35.8401	43.9619	21.0254	23.0782	55.5115	25.4678	53.6235	60.3381	24.6214	23.2105	35.8916	11.8095	18.3881	34.6018	21.6361	11.8385	31.587	11.4689	4.19481	33.748	11.5325	6.60598	29.7695	26.7183	7.1303	56.8328	5.93332	8.55461	19.4248	27.7984	15.7755	15.2715	30.0535	36.6323
281	140.558	5.8566	39.0313	33.8776	61.5403	44.3196	37.6935	86.3752	19.3491	22.2177	9.98752	10.8125	20.6021	16.0382	26.7833	30.0596	42.3079	18.4368	21.6673	55.2103	28.0566	56.2704	55.609	23.1909	22.4413	35.8427	10.1163	17.1034	32.12	22.1032	14.0281	30.3609	12.5003	3.39705	35.6461	11.1429	5.37858	22.7823	25.317	6.0793	56.8228	6.11822	8.06775	18.0915	26.5043	15.5614	15.4079	26.8323	36.613
282	141.059	5.87744	40.9289	32.8655	61.3165	45.1174	41.1093	89.392	18.5999	22.0231	11.0283	9.44011	21.1376	14.5781	28.3693	26.0595	41.1303	16.9965	23.3992	54.1882	26.4993	54.6941	49.9744	21.0594	23.2491	36.1549	12.7536	14.7095	31.5458	22.6189	15.7217	34.6817	11.897	3.62069	34.4684	10.9775	6.79941	20.9817	25.1807	5.14507	53.3586	5.25211	8.74916	17.887	24.0127	15.055	16.6729	25.373	35.7853
283	141.559	5.89828	40.4423	31.1913	62.4162	45.3901	40.1362	95.4937	21.519	23.3659	10.8146	11.5907	21.3031	15.6587	26.7542	24.7267	40.1962	15.955	22.8352	53.8089	26.4897	55.9298	48.9523	25.0687	21.5849	36.3299	13.717	13.6295	31.2053	21.8211	13.785	31.4609	10.0869	5.87855	33.3004	10.5006	7.67612	21.2249	23.7499	5.39809	50.7798	6.09876	6.59859	19.2107	22.3584	15.1136	18.9405	23.1153	33.479
284	142.059	5.91912	39.5276	30.7246	64.7323	43.0639	40.4769	90.7447	23.7674	21.6922	9.3647	16.4369	22.675	15.3668	29.2545	25.7193	40.2251	16.8991	22.4166	51.3075	27.1711	47.5317	47.3566	24.4851	19.853	35.6875	14.5831	14.0866	34.1441	20.7698	11.3814	31.8502	10.8558	7.92184	32.5611	9.65422	7.21828	17.5074	23.9738	6.81889	52.9694	6.53668	6.5695	16.9137	21.1617	15.0063	21.7818	23.2511	35.1239
285	142.559	5.93997	40.9095	30.9288	68.0118	39.7746	39.8437	84.8182	21.344	21.264	8.94617	17.0696	22.3731	15.6296	27.4935	25.3884	40.206	15.2739	23.409	51.5606	29.5067	49.6044	47.3367	24.8842	19.8139	35.678	13.6778	14.4177	35.9931	20.624	9.46432	32.2488	9.32803	9.90742	32.9308	8.93418	8.85343	17.196	26.7474	6.16688	51.8212	5.72896	7.99003	17.1574	22.5336	16.2619	22.8332	23.0275	36.486
286	143.059	5.96081	36.9098	30.7435	75.7192	39.2882	37.1969	87.4262	22.239	20.1544	9.22831	10.7634	26.4897	17.1278	28.4371	23.0817	41.461	15.2739	24.4701	53.4778	25.8865	51.4922	46.5875	25.0301	18.8993	38.0617	11.9069	14.3883	35.9543	19.8941	8.05316	26.4192	9.37673	12.8267	35.3831	9.16783	11.2373	17.8188	28.0612	5.8944	53.1931	5.30077	9.52785	18.3738	17.8237	14.0526	27.4844	20.3026	35.776
287	143.56	5.98165	40.0142	30.9091	79.9913	40.2223	32.526	66.7175	24.3703	21.0499	8.11907	13.5953	27.7162	18.6752	29.5856	24.1233	40.1379	16.6753	24.9175	56.2998	26.587	49.8087	47.5802	25.9933	19.5416	35.6875	10.5444	13.3082	37.9006	18.9598	10.2816	34.3212	7.88781	15.7559	33.1545	8.20413	10.81	18.8602	29.1998	6.45883	53.4267	5.96252	10.4329	19.7848	18.174	13.5372	20.4098	19.1641	32.1462
288	144.06	6.00249	36.6081	33.8871	82.8232	40.1545	29.9467	83.0179	20.3905	21.0694	10.3182	16.6123	27.8325	18.9866	28.4371	25.1253	41.4414	17.4537	24.6254	58.7136	26.2856	50.1593	43.7169	24.991	20.2326	34.4026	10.4764	13.4736	36.1296	19.1542	11.3425	34.7883	9.14306	15.6	33.3783	6.94859	9.92358	19.2398	30.9416	6.82862	56.3851	5.83601	9.00237	19.3857	17.0936	14.0336	25.2752	21.9083	30.2385
289	144.56	6.02333	35.1192	35.3272	81.1299	39.2882	27.553	82.9011	18.7263	20.8553	9.72469	14.2281	25.9352	18.8993	28.2132	25.9233	42.7652	17.96	24.8592	60.8936	25.2828	50.8307	41.7899	22.8986	21.984	35.22	11.5176	15.4782	34.0566	19.417	11.099	37.3582	10.7294	18.6265	33.0669	7.23089	10.0405	22.5972	29.404	7.03299	55.8987	5.95279	7.82456	19.0352	14.6121	15.1041	14.4737	21.7818	30.7448
290	145.06	6.04418	35.1776	32.6314	75.4175	36.5727	26.5607	79.9719	17.8793	22.5195	8.7805	13.5176	26.7916	20.6021	28.3985	25.2327	43.9913	19.4976	24.3529	61.5846	22.9377	51.1614	37.7902	24.0278	23.5023	37.6337	11.4104	14.8164	34.4363	17.49	8.48127	39.2267	11.6343	19.7166	32.3857	6.71542	9.1067	26.2952	29.4236	5.43701	59.5575	5.91386	7.21181	15.96	13.1915	14.7341	19.6506	22.6189	29.4892
291	145.56	6.06502	31.9175	25.0894	76.5269	37.5367	25.2277	78.3078	20.974	22.1204	9.02402	11.9412	26.8984	19.9698	28.311	31.0717	42.6191	20.8502	23.5453	62.2853	23.0545	55.2584	35.6296	19.5221	23.8819	34.9772	12.0333	15.3419	36.1783	17.315	9.14306	35.9857	13.2304	17.3715	30.0505	7.90229	8.51248	29.4967	29.9589	5.60245	61.4068	4.45413	6.77359	16.7874	14.6121	14.0526	17.9085	24.1367	28.7593
292	146.061	6.08586	32.0148	19.8932	80.0595	36.9912	26.4635	80.4195	21.344	20.7771	9.80254	9.85878	28.0175	19.7362	24.3114	27.0428	42.23	18.9426	10.1157	62.986	20.5144	59.9781	39.2986	20.1544	23.94	33.4591	11.0699	14.7971	34.6599	15.8551	9.17214	37.8541	12.3059	14.8995	27.8801	8.29187	9.94306	32.6305	28.723	7.12057	62.7009	2.85815	5.92719	15.7459	16.0331	16.5151	20.2541	24.1274	28.6229
293	146.561	6.1067	34.545	31.8431	82.8135	34.6265	26.9014	81.2954	20.8769	20.9135	11.661	10.462	26.4606	18.1793	24.0189	25.826	43.7385	17.2786	24.4112	62.2266	21.809	59.2288	37.1773	18.0429	25.0883	35.9405	11.2938	15.1475	31.9741	15.2908	7.70283	40.3065	13.8141	13.3812	28.3375	8.05821	10.984	35.7248	27.5746	7.14977	60.1417	5.14507	6.80268	20.2516	16.4805	15.6682	18.9113	23.3582	28.8371
294	147.061	6.12754	39.0897	34.8409	84.39	34.7337	26.3663	80.1957	20.5169	18.9479	11.2718	9.9656	24.8451	18.0429	24.7685	26.7018	46.7456	17.8916	30.9803	62.7232	20.1157	56.4654	37.2745	19.9598	25.2928	36.1352	11.6732	15.8579	31.614	14.9987	8.12113	35.9273	16.4125	9.43058	29.0285	8.84644	12.1919	32.8542	28.285	7.70446	56.171	5.8652	5.48897	22.8891	16.3446	14.7145	17.0914	26.2387	29.1099
295	147.561	6.14839	38.0289	32.1837	83.4071	33.2352	22.7946	78.8138	19.1349	18.9088	11.8167	10.2479	24.7187	19.7457	19.8735	24.8917	49.2562	18.1838	31.2429	61.6915	19.2884	54.1977	32.9826	20.6703	28.4849	38.6261	10.0869	15.9161	31.0398	15.2323	9.40581	34.691	19.5168	9.40101	28.4252	8.28186	10.547	33.2142	29.2583	6.53668	57.7575	6.28366	3.67886	20.7676	16.7629	15.6	16.1864	29.0221	31.387
296	148.061	6.16923	37.2699	35.4833	89.4699	34.5484	21.9766	79.8064	15.0187	17.4979	11.3397	8.49596	23.4923	20.0375	19.961	25.0474	48.7598	18.1642	32.8195	58.1688	19.3661	50.6264	31.9998	19.8234	32.1632	40.1443	8.65644	13.8628	29.765	15.3201	7.73191	32.1803	16.8795	10.7052	27.3934	8.80734	10.1574	36.6203	31.477	5.76789	54.6332	6.63399	4.80803	18.9675	15.2154	13.9945	14.4737	32.1947	33.9168
297	148.562	6.19007	39.6054	33.9068	88.7984	36.0863	23.1931	78.0742	11.9239	18.1888	10.3182	8.35004	22.7432	19.1716	22.3943	26.381	46.5505	18.5825	31.3792	58.5384	20.9235	48.8552	34.6082	17.3906	29.0003	39.1518	12.3837	13.7363	27.517	15.9529	7.68321	29.1635	16.4514	8.03866	29.4956	9.75149	8.64886	40.396	27.4772	6.00144	52.6481	7.1595	5.38216	16.836	12.6562	14.6659	13.6267	30.8127	35.221
298	149.062	6.21091	39.8974	33.7216	90.589	35.2303	21.9476	74.8434	17.5193	17.8288	9.96759	7.54227	23.2977	19.9598	22.2871	25.6703	45.811	19.3708	29.8222	59.1323	19.5025	51.1029	36.6809	15.3182	28.4849	40.8742	11.683	13.2304	26.8066	16.8385	8.8218	24.2689	16.724	6.89042	28.3957	7.63954	9.89435	40.9701	33.0731	5.39809	48.5319	8.18131	3.74705	15.9409	12.6075	14.88	13.6466	31.2119	37.6151
299	149.562	6.23175	40.7343	31.7753	91.6595	37.1765	25.7234	75.2326	15.4372	16.4369	9.88974	7.64956	23.2591	18.9966	18.0928	27.2468	45.5385	21.0156	30.0462	61.4094	19.6971	53.9834	36.7488	14.4909	31.9396	41.9935	10.7294	12.7925	27.2055	18.7649	7.90707	27.471	15.6922	6.44266	30.3227	9.24556	8.79498	37.6908	38.1918	5.58299	47.8991	6.87728	3.56204	14.8313	10.8751	13.6244	15.2616	30.0635	38.0144
300	150.062	6.2526	39.8585	31.2693	92.8856	37.342	28.322	77.4514	16.0108	17.7897	7.92412	10.2965	22.4122	17.8188	19.8546	28.9112	39.1646	20.0325	28.0216	62.8012	20.5144	51.0543	42.0913	13.6244	34.8493	40.1253	10.7196	11.5467	29.0256	20.0398	7.8293	30.4091	16.2083	7.61046	31.8217	8.69099	8.07552	35.6471	40.5955	6.6048	50.2543	6.53668	2.90065	12.5639	11.43	13.7222	13.8309	30.5598	38.4229
301	150.562	6.27344	39.44	30.2572	90.0732	39.3852	28.0198	75.2034	14.8044	16.5151	8.30342	13.2744	21.0403	18.0233	24.8174	25.9723	39.2523	21.2587	24.3338	61.2343	19.5316	49.293	46.1789	13.0603	35.978	43.4045	10.4859	12.7049	26.5634	20.0498	6.92438	31.2951	13.386	7.88321	31.0038	9.73194	5.26307	32.8933	35.9924	6.96487	51.8989	6.12795	2.25834	13.7122	12.5977	13.3131	12.3617	29.2171	37.4109
302	151.063	6.29428	39.8487	28.3496	89.8786	41.7018	25.4703	76.7702	16.6922	16.8651	6.54209	16.5442	20.9817	19.7557	23.4742	26.5562	40.9259	20.9084	21.2292	64.679	20.0475	50.5386	50.6651	12.4376	36.8926	43.1128	10.8268	15.702	23.9456	19.6506	6.45703	30.8957	15.021	9.81968	31.6267	9.20646	5.56366	30.5091	29.9782	7.685	51.8212	5.55379	4.13664	14.1013	10.7486	12.934	10.824	28.3893	34.8125
303	151.563	6.31512	40.2283	24.8955	87.2024	41.1272	25.3345	77.7142	16.9064	17.4297	7.03848	15.4736	20.3494	18.0038	24.7394	27.0031	41.0425	19.4681	20.3147	63.8907	19.5221	49.8573	52.6992	12.0384	35.6084	42.9473	9.88262	15.3811	23.274	18.6092	6.09724	29.9226	12.3157	10.7929	33.5635	11.2989	7.70535	29.0103	36.0509	7.76285	49.3492	5.90413	6.034	13.829	10.6222	13.4885	11.9824	25.8202	34.3453
304	152.063	6.33596	40.6078	23.572	84.6236	39.2299	24.4876	76.9746	15.7094	17.5269	8.1091	14.7631	19.512	15.25	27.2894	27.3347	37.4321	18.6312	16.2662	66.2064	19.9598	48.9623	40.5636	12.3207	35.248	42.8598	9.08455	15.8285	23.0697	16.06	6.02892	30.5259	13.0647	11.4839	32.5414	11.9507	7.25725	26.4993	34.5133	7.11084	46.7023	5.57326	6.99771	15.055	9.78522	14.1308	10.639	22.9496	34.9196
305	152.563	6.35681	41.7853	23.5034	83.6017	40.8253	24.5463	73.4517	13.9866	14.4131	8.03125	15.9991	19.5416	14.3254	24.7197	30.8957	36.0016	17.5609	15.6629	71.472	20.4758	59.0831	36.5445	11.1916	37.934	44.0564	10.6418	15.303	23.5663	13.5974	6.32075	33.5333	11.4882	11.9803	30.78	12.1844	7.26699	24.8937	35.5058	6.54641	45.8363	5.43701	7.08497	14.0822	9.06528	14.014	10.8725	24.7888	34.1996
306	153.064	6.37765	41.9897	25.6348	83.2611	41.9446	24.1565	71.7682	14.6001	13.7122	9.69542	13.9749	20.1839	13.9749	22.9485	28.7454	34.2887	16.6462	13.3566	75.7242	20.203	61.2922	51.6385	10.6956	33.4479	47.1999	12.1111	14.3301	23.2352	12.9359	6.74921	28.1903	15.4687	13.0408	27.2769	12.9044	8.33714	23.1613	34.3381	5.7095	46.7705	5.06721	8.05821	12.7976	9.52247	14.2086	10.5904	24.8766	34.1797
307	153.564	6.39849	43.3229	25.8193	82.9108	43.8325	22.6483	71.0481	15.7579	13.3617	11.6903	11.4543	18.2084	14.4322	25.8879	26.1864	29.2478	16.2275	11.9844	75.4132	19.4148	60.7473	47.3566	11.6784	31.3946	46.47	12.3739	13.717	22.4177	13.7045	6.13613	26.9252	15.9746	14.7436	24.7172	13.469	10.3912	23.0741	37.0823	5.35916	48.7556	5.75815	6.85132	14.5004	10.0189	16.651	12.6831	23.3389	31.6398
308	154.064	6.41933	41.0846	25.0705	83.2806	38.928	23.6897	68.8585	16.0401	11.3766	11.1939	11.9412	18.5779	13.9167	24.856	23.4125	29.6375	17.0645	13.6678	73.9628	24.0178	60.533	48.8645	7.68866	33.1265	48.3287	12.1209	13.1232	22.6904	14.3566	5.25048	32.7447	14.7971	13.7413	23.0435	13.1867	10.4009	22.1886	35.7006	4.71688	50.7893	6.95513	5.77126	16.6219	10.3303	15.7655	14.6194	23.3489	28.0293
309	154.564	6.44017	42.9044	24.7977	82.1128	37.9939	22.3663	70.1625	14.1623	11.7662	13.6659	12.9239	18.3638	13.9654	20.0099	20.4541	29.7056	14.7193	14.9234	71.3642	21.4781	55.1612	52.777	9.22601	34.0415	51.6473	11.3523	12.8605	24.4516	13.9188	4.51092	34.6038	14.1353	11.8634	20.8732	12.7585	9.30153	23.9205	30.3187	5.57326	50.4198	7.32493	4.12662	20.5339	11.1477	14.88	14.8823	23.261	24.9738
310	155.064	6.46102	43.683	21.8299	81.8793	39.4829	24.8572	72.5564	12.3424	12.0384	15.5437	12.1939	18.5879	14.5199	23.2409	19.4319	29.1508	14.3203	16.3441	70.1381	22.4513	50.6551	45.7996	11.1725	25.1956	53.7393	16.1596	12.8118	25.0454	12.8481	4.5887	34.9736	15.1667	11.1429	20.2411	13.7999	7.85147	27.823	29.8808	7.09138	49.8843	6.33232	4.69121	20.6899	12.7631	14.4909	12.0017	20.7112	26.7451
311	155.565	6.48186	45.1232	20.1659	81.4511	38.9958	24.1959	70.1333	12.1282	12.7098	16.0108	9.79059	18.977	15.5027	22.1894	18.8683	28.771	14.4566	15.4585	68.3671	23.3855	53.3314	42.9284	11.9412	31.4141	54.109	18.6508	12.9771	27.011	11.9724	5.45472	32.7354	15.303	9.21647	20.8444	15.96	9.02877	21.079	34.8149	7.19842	50.2929	6.69238	5.93673	21.7117	15.5076	16.4078	11.8068	22.5311	26.9201
312	156.065	6.5027	48.0135	18.2095	79.1642	38.12	26.2585	69.1017	12.391	12.8658	16.4779	10.1406	19.2493	17.3715	20.9148	18.8776	25.5791	13.8628	14.7675	63.91	23.2686	51.5021	31.6498	12.4376	33.2142	56.0946	18.1838	14.184	27.9842	12.5953	4.45241	36.4824	14.9723	8.55461	21.9632	13.7122	9.37946	27.278	37.7052	6.36151	46.2059	5.53433	6.78361	18.2279	15.3324	16.1551	12.7703	22.1418	26.2973
313	156.565	6.52354	45.8336	18.2292	80.8672	36.7287	27.4269	67.4377	12.3324	11.7171	15.3593	8.48642	18.9379	16.4369	23.192	20.8917	25.657	15.0599	15.3125	66.0023	25.7306	59.1124	41.177	12.7585	31.7446	59.4423	18.1544	15.5854	28.977	12.5853	4.63739	36.0441	14.7193	8.17504	21.0197	12.3012	7.75406	30.4795	38.8049	5.42728	39.9191	6.12795	6.67632	17.0501	14.7095	16.476	13.7244	20.5655	25.0616
314	157.065	6.54438	42.6514	18.2292	87.5041	33.6924	24.9351	69.9289	12.3032	10.8125	16.0793	7.94139	20.1739	15.9896	21.8686	21.1836	26.6303	14.2618	15.5168	66.7906	28.1439	58.2753	43.8041	12.3107	33.8856	63.1495	20.8502	15.4589	28.6169	11.856	5.10439	33.8448	14.8749	7.11406	22.3427	13.2744	7.28647	28.7376	37.0336	6.70211	36.8831	5.90413	7.58137	16.7583	15.0112	17.3419	14.493	20.1276	27.3579
315	157.565	6.56523	42.3108	17.1004	96.9826	32.4469	24.6338	72.1088	10.5811	11.8148	14.6095	7.72728	16.5537	16.116	19.4943	17.9722	29.0631	14.3105	17.1223	66.2064	27.307	59.0146	49.4387	13.1285	32.7278	66.9843	21.8718	15.5269	28.5682	9.77327	6.30149	34.9448	21.8623	6.68585	23.209	13.0117	8.43455	28.2903	34.8342	6.88701	35.9003	5.53433	8.28186	17.3228	14.2425	15.6196	13.7824	21.8404	27.2608
316	158.066	6.58607	41.5712	19.2019	109.322	32.2909	26.8812	71.4179	11.8946	12.4276	14.8823	8.71006	14.9386	17.6047	19.5818	16.0166	27.4865	14.369	16.9376	64.3777	29.0103	57.1268	53.7499	13.3522	31.7741	69.6313	23.682	14.9334	29.4245	12.1282	6.20409	35.4213	22.164	8.51551	21.5059	12.7976	8.85343	27.5893	33.4816	6.28366	34.1874	5.85547	9.91696	16.7387	13.2108	15.5614	12.9652	22.2296	27.5043
317	158.566	6.60691	40.238	19.8932	116.261	31.6681	27.9323	73.8118	13.9188	11.4448	13.8309	9.28418	15.0259	16.2719	15.5917	19.5783	25.511	13.5513	14.6896	63.3161	29.6135	53.8377	49.4294	11.6589	29.8567	69.7968	21.4826	14.2814	28.3344	13.6659	7.42046	35.8588	27.0298	10.4715	20.1822	11.8243	9.46713	27.6671	30.0171	6.35178	30.9664	4.34708	10.5593	17.5074	11.0114	15.3373	13.8509	23.1053	26.7644
318	159.066	6.62775	41.8145	20.2723	119.034	31.1723	24.1661	73.5977	15.6707	12.5058	13.0723	7.81502	15.3277	15.3082	20.3504	21.836	24.7911	14.4566	11.8089	63.4239	30.314	52.3	55.7547	12.2816	32.1437	70.0104	27.5066	13.6389	29.5802	13.3838	7.2064	39.1192	26.1634	8.64235	20.669	10.9288	8.54171	27.0152	33.9584	5.57326	31.8228	5.30077	11.3766	16.8751	11.1964	16.1841	13.6466	23.1346	25.5188
319	159.566	6.64859	37.6591	22.3257	123.657	30.6852	27.2614	69.6175	15.3786	11.8048	16.6143	7.46454	14.0917	16.7292	18.4625	22.3031	22.5137	11.0503	11.4394	64.1044	32.1537	51.5115	56.3483	13.0312	31.4818	73.0373	28.5478	13.9504	32.3048	12.3717	8.26722	39.4595	33.141	8.1264	19.2675	11.8339	7.27673	33.487	32.2456	5.07695	33.1265	5.67057	12.9435	16.0769	11.3715	17.1865	11.8653	27.115	27.2707
320	160.066	6.66944	30.0588	21.9663	126.849	31.3079	30.706	69.0044	14.9794	10.3061	15.6508	6.45268	12.2235	17.7701	17.3724	24.0937	21.0542	10.8362	9.95054	64.7665	30.1195	51.7357	54.2363	13.1285	31.4237	77.2703	28.9955	12.9382	32.6359	11.2718	8.39369	42.1166	25.6964	8.00004	21.2527	12.2134	7.61768	34.0511	30.8639	4.65849	34.0315	5.38836	10.7929	14.6272	9.77576	16.5051	11.2911	29.9663	27.3872
321	160.567	6.69028	31.2655	21.022	131.461	32.8363	30.1026	67.895	14.1816	10.3938	13.5488	6.45268	12.8753	20.1353	18.5405	25.4172	24.1878	12.7729	11.0503	67.9003	29.7986	49.4294	51.2879	11.7271	32.3869	79.0707	27.7886	10.9144	32.85	9.76331	8.53978	44.3066	23.3513	7.51318	20.7082	10.6079	5.39806	30.8009	30.6596	5.45648	35.4234	4.38601	8.59324	14.7922	11.099	19.3761	11.1553	29.3236	26.4922
322	161.067	6.71112	32.3652	20.9636	125.73	33.0791	30.0544	66.9219	14.1423	12.3594	13.2374	6.12174	9.44965	17.6829	19.7663	21.2327	21.7643	11.3327	11.313	65.7396	30.5091	45.566	53.7013	12.408	32.9124	76.6184	25.5601	9.91169	34.4751	8.34266	7.7221	44.2676	20.8502	7.3768	20.9222	12.1162	7.33518	32.5037	33.8613	5.07695	37.3208	3.54909	9.82922	16.4273	12.4712	20.3685	12.031	26.8908	26.3266
323	161.567	6.73196	31.937	19.9318	120.951	31.3182	30.2094	66.4061	14.5316	12.8267	16.1279	5.86854	10.0824	17.9842	19.6496	19.189	22.6112	12.666	10.9625	61.575	31.5405	45.1668	49.8573	13.4885	31.1027	72.5313	25.5699	9.16268	32.5582	8.34266	9.54209	41.9025	21.1421	7.96094	23.2477	11.5521	7.35466	30.0904	33.7345	4.68768	36.3671	5.35916	8.07777	18.6561	13.9504	19.7457	10.824	25.6938	26.1708
324	162.067	6.7528	31.0611	18.0637	120.698	31.0257	32.886	69.1504	13.2374	13.6735	15.5343	6.02447	9.9656	17.0892	19.3091	18.0213	21.5992	13.853	12.6361	63.2872	30.7422	41.9649	41.9456	14.3645	29.6722	71.0714	23.896	11.1477	28.0814	8.79046	7.8293	48.7239	16.257	6.85132	23.3451	12.243	8.89239	30.6354	33.4816	5.27158	35.1802	6.40044	5.40171	18.2374	15.235	19.3466	10.0847	26.638	26.083
325	162.567	6.77365	32.1997	17.0902	118.032	30.3935	30.502	68.3524	14.2302	17.0601	12.4688	7.81502	11.3866	15.24	19.9421	17.9146	20.5676	12.9288	13.0743	62.3921	30.1586	49.8573	48.6509	7.61046	29.4872	70.9642	22.6019	14.8847	28.1689	9.81189	6.71033	47.8582	14.7775	7.38682	24.727	9.91696	9.25282	33.3215	34.445	5.73869	29.4481	5.4954	5.77126	18.6461	15.7507	19.1034	9.73403	28.0879	26.6573
326	163.068	6.79449	32.443	18.803	116.475	32.953	29.5289	65.7152	16.0108	18.8116	13.8509	8.82689	10.6565	15.795	19.5818	17.9722	20.8499	11.1379	14.0667	62.4018	28.9812	49.838	48.3195	12.9726	29.954	71.6942	19.5459	15.8285	26.3006	10.9504	7.80022	45.2501	14.2716	5.9949	25.2917	11.1916	8.07552	34.2652	36.1385	5.98198	25.4969	4.99909	6.37447	17.0892	16.2472	20.6703	10.4546	27.835	28.0978
327	163.568	6.81533	33.0464	19.5716	113.429	32.0284	28.2441	68.3913	14.7266	20.2326	14.2694	10.4815	9.60558	17.2156	20.9731	12.9219	23.3894	12.5199	13.707	62.1776	29.5845	43.8041	44.7875	15.1332	29.2535	67.2082	16.6168	15.4687	21.4155	10.5126	8.26722	32.6474	16.4805	5.16805	25.7392	11.873	7.20854	32.6596	37.8706	5.83601	23.2882	4.96017	5.38216	14.004	15.8772	19.9403	12.1674	26.3751	28.8957
328	164.068	6.83617	30.3994	17.0712	111.025	30.831	26.9496	66.6591	15.7193	22.7336	11.8653	9.82922	9.89741	17.7511	19.9224	14.2361	22.8254	14.1451	14.5533	61.808	31.6378	44.6704	46.8989	14.7827	27.7648	67.2374	20.1107	14.5053	19.6343	11.9824	7.7221	37.5918	17.1132	6.44266	23.4812	9.65422	5.8559	30.6063	41.0138	5.43701	22.8695	4.6293	4.4771	13.8094	14.252	19.6875	12.0503	24.3217	26.7744
329	164.568	6.85701	32.0927	16.7402	109.731	31.717	24.9448	63.3309	17.1692	22.4609	9.96759	8.11639	10.4424	16.661	21.8489	13.4085	21.5409	13.386	12.6171	58.6164	33.0778	42.257	42.5684	11.7271	28.3485	67.0813	20.5388	16.1498	18.8851	11.1553	6.28187	47.6153	16.2177	6.5304	25.0777	10.8706	4.45455	29.779	43.5344	4.89205	23.8137	4.19138	4.02935	12.1748	13.5321	20.0475	12.2353	22.1325	27.4165
330	165.069	6.87786	32.735	17.9856	110.149	31.1621	24.0497	58.9323	18.1714	21.0694	8.99475	7.8732	10.1406	16.9042	25.4496	12.3085	23.6428	13.6585	12.6263	58.704	29.9445	42.0235	41.4978	11.4157	26.1297	64.6874	19.9548	14.2814	19.2746	11.0283	6.38907	44.3743	15.2935	5.92719	25.136	9.95606	4.71756	26.1879	49.0522	4.785	23.7064	4.11352	4.94394	12.1162	12.8118	18.072	13.3252	21.2176	28.5064
331	165.569	6.8987	31.8981	17.2368	112.466	35.1325	21.2277	59.2923	18.6871	16.5246	8.76119	9.37192	10.3256	18.0815	26.0242	10.5186	22.6891	14.1063	10.5342	57.2054	30.0418	48.3195	20.2541	11.357	25.8574	61.9237	18.2227	13.2595	21.6489	12.0403	5.44492	35.918	15.3811	6.2772	25.7294	7.81502	8.92162	26.7134	51.8742	4.4152	24.7478	4.54171	5.71309	10.3061	12.6366	16.8846	13.5295	21.6361	26.9201
332	166.069	6.91954	32.2873	19.7277	111.317	37.2734	24.5848	58.7182	17.4807	16.0187	8.69268	9.05101	10.4715	17.0696	26.2087	10.0998	23.6134	13.8824	9.41539	57.3123	30.7718	47.9988	37.1381	10.6275	26.9957	60.3961	15.7507	13.1134	21.2692	14.1137	6.3113	44.1213	16.1011	6.92952	24.9704	9.00237	8.84369	23.035	54.3167	4.52225	27.103	4.48332	5.01212	8.1264	13.853	17.0406	10.4054	19.8063	25.8009
333	166.569	6.94038	33.8736	22.2674	107.395	38.5291	27.6896	54.8548	16.1958	16.3982	9.1598	9.64468	10.2283	15.0941	25.4204	10.0025	24.8788	14.1742	9.92111	56.5433	32.4551	48.0374	46.1204	9.88787	25.6042	61.2135	13.8726	15.5658	20.6856	10.8146	8.03354	43.2454	17.8139	8.65189	24.8343	8.61279	11.1788	26.5288	56.0295	5.56352	28.4362	4.67795	7.35773	8.91463	13.5611	16.9819	10.6103	20.9255	25.0709
334	167.069	6.96122	34.1655	21.0898	104.272	36.7193	29.9467	55.5262	16.7607	16.7974	9.43259	8.53506	12.1066	14.4031	27.3769	8.49447	24.4892	14.8458	12.8601	58.3344	32.1632	48.2516	46.8796	9.79059	24.9228	58.3427	16.1109	13.3082	20.9484	9.63688	7.81949	40.8904	18.1155	10.0142	23.0533	9.37192	12.4827	25.536	52.6432	4.90178	32.3578	3.79238	8.36959	10.4033	12.0042	18.3738	10.6782	20.7698	26.8522
335	167.57	6.98207	34.4964	21.878	106.091	36.4663	31.7763	51.4293	14.8044	15.7559	10.9018	8.21414	13.1671	14.1695	27.5716	9.72064	23.0586	15.0988	13.5217	62.7232	31.4332	49.4873	46.2468	10.5202	24.446	55.326	17.5707	11.1673	21.1719	10.0068	8.23814	41.8441	20.0325	9.55694	21.7395	8.42825	12.8627	23.8623	54.0638	5.21319	35.1993	4.09406	7.98049	11.7662	11.5758	17.2837	13.1595	19.2227	27.4358
336	168.07	7.00291	33.8638	20.7492	110.325	35.2011	30.5309	51.5752	15.3008	14.8218	11.3596	10.8125	11.9993	14.2963	30.3841	11.5011	24.178	16.4805	14.1446	66.1293	29.8372	51.4629	44.184	13.5567	24.4851	55.9779	16.9576	10.4179	20.2866	10.9218	8.69533	39.5186	19.8185	10.1797	22.2164	6.84178	9.76772	20.1157	53.1589	5.8944	34.3529	4.47359	7.98049	9.88787	11.2062	16.9819	13.4323	17.5485	26.4922
337	168.57	7.02375	33.4648	19.8735	105.799	33.6246	30.5992	53.6091	16.2643	14.9772	12.1574	11.2307	13.4108	15.24	25.6443	11.7837	24.3338	16.8116	15.186	63.8522	30.3045	51.7064	48.5045	12.953	23.6773	53.7101	15.021	11.6052	18.8753	11.856	8.89012	42.3112	20.2371	9.72241	23.3353	7.27953	11.8802	18.4611	56.4286	6.44909	36.7081	2.77057	5.55716	9.56648	11.7026	15.8437	12.2739	16.5558	26.2873
338	169.07	7.04459	31.0903	18.375	106.228	33.4882	29.6069	51.439	15.3201	14.4322	10.5811	10.5884	12.4667	15.2691	27.1041	11.5984	23.9442	15.7409	15.9839	65.4961	34.3238	53.6135	51.8621	13.8094	21.9449	49.8083	15.1184	11.897	19.43	12.3231	9.56136	46.126	24.8206	8.73963	23.5983	7.36727	14.1861	14.8509	54.2684	6.45883	40.8046	3.04305	4.72029	11.3184	11.7415	15.8337	13.2959	17.2278	27.9222
339	169.57	7.06543	31.1098	21.5667	104.213	33.7704	31.2412	55.2148	15.0087	14.7436	9.00409	9.99468	12.8658	14.0336	30.2666	12.2407	24.7426	15.7896	15.9839	68.1333	35.5107	53.322	53.0978	13.7513	22.0231	46.295	17.4733	12.1889	16.8803	14.2109	10.9238	45.2984	22.8741	7.46454	23.1214	7.9514	14.1374	13.3426	56.7498	8.22997	32.2119	3.83131	3.62069	11.5034	10.3205	16.6805	12.5853	18.6092	30.6277
[truncated: 84 more columns]
